# Scavenger Receptors Mediate the Role of SUMO and Ftz-f1 in *Drosophila* Steroidogenesis

Ana Talamillo<sup>1\*</sup>, Leire Herboso<sup>1</sup>, Lucia Pirone<sup>1</sup>, Coralía Pérez<sup>1</sup>, Monika González<sup>1</sup>, Jonatan Sánchez<sup>1,2a</sup>, Ugo Mayor<sup>1,2</sup>, Fernando Lopitz-Otsoa<sup>1</sup>, Manuel S. Rodríguez<sup>1,2b</sup>, James D. Sutherland<sup>1</sup>, Rosa Barrio<sup>1\*</sup>

<sup>1</sup> CIC bioGUNE, Derio, Bizkaia, Spain, <sup>2</sup> IKERBASQUE, Basque Foundation for Science, Bilbao, Spain

## Abstract

SUMOylation participates in ecdysteroid biosynthesis at the onset of metamorphosis in *Drosophila melanogaster*. Silencing the *Drosophila* SUMO homologue *smt3* in the prothoracic gland leads to reduced lipid content, low ecdysone titers, and a block in the larval–pupal transition. Here we show that the SR-BI family of Scavenger Receptors mediates SUMO functions. Reduced levels of *Snmp1* compromise lipid uptake in the prothoracic gland. In addition, overexpression of *Snmp1* is able to recover lipid droplet levels in the *smt3* knockdown prothoracic gland cells. *Snmp1* expression depends on Ftz-f1 (an NR5A-type orphan nuclear receptor), the expression of which, in turn, depends on SUMO. Furthermore, we show by *in vitro* and *in vivo* experiments that Ftz-f1 is SUMOylated. RNAi-mediated knockdown of *ftz-f1* phenocopies that of *smt3* at the larval to pupal transition, thus Ftz-f1 is an interesting candidate to mediate some of the functions of SUMO at the onset of metamorphosis. Additionally, we demonstrate that the role of SUMOylation, Ftz-f1, and the Scavenger Receptors in lipid capture and mobilization is conserved in other steroidogenic tissues such as the follicle cells of the ovary. *smt3* knockdown, as well as *ftz-f1* or Scavenger knockdown, depleted the lipid content of the follicle cells, which could be rescued by *Snmp1* overexpression. Therefore, our data provide new insights into the regulation of metamorphosis via lipid homeostasis, showing that *Drosophila* Smt3, Ftz-f1, and SR-BIs are part of a general mechanism for uptake of lipids such as cholesterol, required during development in steroidogenic tissues.

**Citation:** Talamillo A, Herboso L, Pirone L, Pérez C, González M, et al. (2013) Scavenger Receptors Mediate the Role of SUMO and Ftz-f1 in *Drosophila* Steroidogenesis. *PLoS Genet* 9(4): e1003473. doi:10.1371/journal.pgen.1003473

**Editor:** Eric Rulifson, University of California San Francisco, United States of America

**Received:** August 30, 2012; **Accepted:** March 7, 2013; **Published:** April 18, 2013

**Copyright:** © 2013 Talamillo et al. This is an open-access article distributed under the terms of the Creative Commons Attribution License, which permits unrestricted use, distribution, and reproduction in any medium, provided the original author and source are credited.

**Funding:** RB thanks the Spanish MICINN (grants BFU2008-01884, BFU2011-25986) and the Consolider Program (CSD2007-008-25120), the Departments of Education and Industry of the Basque Government (PI2009-16 and PI2012/42), and the Bizkaia County. The funders had no role in study design, data collection and analysis, decision to publish, or preparation of the manuscript.

**Competing Interests:** The authors have declared that no competing interests exist.

\* E-mail: atalamillo@cicbiogune.es (AT); rbarrio@cicbiogune.es (RB)

<sup>2a</sup> Current address: McKnight Brain Institute, University of Florida, Gainesville, Florida, United States of America

<sup>2b</sup> Current address: Inbiomed, Donostia, Gipuzkoa, Spain

## Introduction

Larval molting and metamorphosis in *Drosophila melanogaster* relies on pulses of ecdysteroid hormones. During the larval stages, the prothoracic gland (PG) is the tissue responsible for the synthesis of the steroid hormone ecdysone that is secreted to the hemolymph and converted to 20-hydroxyecdysone (20E) in target tissues [1]. Other tissues releasing ecdysteroids in the adult are the gonads, ovaries and testes. Cholesterol is the precursor of all steroid hormones. In arthropods, which are unable to synthesize cholesterol, ecdysteroids are synthesized from dietary cholesterol or phytosteroids. Cholesterol is converted to 20E through a series of enzymatic reactions that involve the cytochrome P450 enzymes coded by the Halloween genes *spook*, *spookier*, *phantom* (*phm*), *disembodied* (*dib*), *shadow*, *shade* and the Rieske non-heme iron oxygenase gene *neverland* [2,3]. A transcriptional cascade triggered by 20E occurs at the onset of metamorphosis that leads to the sequential expression pattern of the transcription factors DHR3, Ftz-f1, E74 and E75 [4]. A similar transcriptional cascade is required during embryogenesis and could also be required for each larval molting [5]. However, many of the aspects involved in the regulation of ecdysteroid biosynthesis remain unknown.

The conjugation of SUMO (Small Ubiquitin-related MODifier) to target proteins is a reversible post-translational modification highly conserved in all eukaryotic organisms. SUMOylation regulates diverse cellular processes including cell survival and proliferation, nuclear import, intracellular trafficking, transcriptional regulation and maintenance of genomic and nuclear integrity [6]. In addition, *Smt3*, the only SUMO homologue in *Drosophila*, has a role in the regulation of ecdysteroid levels during post-embryonic development [7]. *Smt3* is required in the PG to produce the ecdysteroid peak necessary for the larval to pupal transition. Interestingly, *smt3* knockdown PG cells results in reduced intracellular channels and, as a consequence, exhibit low levels of lipid and sterol droplets indicating that impaired cholesterol uptake could contribute to the low ecdysteroid levels observed.

The nuclear hormone receptor superfamily function as transcription factors that regulate several functions such as metabolism, development and homeostasis. Recent studies have implicated the *Drosophila* nuclear receptors DHR96 and dHNF4 in cholesterol and triacylglycerol homeostasis and in lipid mobilization and fatty acids  $\beta$ -oxidation [8–11]. However, it is unknown whether the nuclear receptors might regulate cholesterol homeo-

## Author Summary

Steroid hormones are cholesterol derivatives that control many aspects of animal physiology, including development of the adult organisms, growth, energy storage, and reproduction. In insects, pulses of the steroid hormone ecdysone precede molting and metamorphosis, the regulation of hormonal synthesis being a crucial step that determines animal viability and size. Reduced levels of the small ubiquitin-like modifier SUMO in the prothoracic gland block the synthesis of ecdysone, as SUMO is needed for cholesterol intake. Here we show that SUMO is required for the expression of Scavenger Receptors (Class B, type I). These membrane receptors are necessary for lipid uptake by the gland. Strikingly, their expression is sufficient to recover lipid content when SUMO is removed. The expression of the Scavenger Receptors depends on Ftz-f1, a nuclear transcription factor homologous to mammalian Steroidogenic factor 1 (SF-1). Interestingly, the expression of Ftz-f1 also depends on SUMO and, in addition, Ftz-f1 is SUMOylated. This modification modulates its capacity to activate the Scavenger Receptor *Snmp1*. The role of SUMO, Scavenger Receptors, and Ftz-f1 on lipid intake is conserved in other tissues that synthesize steroid hormones, such as the ovaries. These factors are conserved in vertebrates, with mutations underlying human disease, so this mechanism to regulate lipid uptake could have implications for human health.

stasis in the PG. The mammalian NR5A2 Liver receptor homolog 1 (LRH-1), member of the Ftz-f1 subfamily of nuclear receptors, has been shown to be involved in lipid absorption and homeostasis [12]. In addition, LRH-1 and its close relative Steroidogenic Factor 1 (SF-1 or NR5A1) are modified by SUMO and also bind phospholipids [13–20]. Recently, the disruption of SF-1 SUMOylation in mice showed the inappropriate activation of target genes that led to endocrine abnormalities and changes in cell fate [21]. Interestingly, SF-1 regulates the expression of proteins related to sterol uptake and/or mobilization such as the Scavenger Receptor Class B type I (SR-BI), which belongs to the Cluster of Differentiation 36 (CD36) family [22,23]. SR-BI, in addition to its role in the selective uptake of High Density Lipoprotein cholesteryl ester, is required for the formation of the microvillar channels in the mammalian adrenal gland [24]. SF-1 and its *Drosophila* orthologue Ftz-f1 control the transcriptional regulation of cytochrome P450 enzymes involved in sterol conversion, and therefore could play similar roles in the activation of steroid synthesis [25,26].

In order to clarify the role of SUMOylation in the mechanism of cholesterol uptake, we analyzed the function of the *Drosophila* CD36 family and Ftz-f1 in the PG during steroidogenesis at the onset of pupariation. We show that the *Drosophila* CD36 family member Sensory neuron membrane protein (*Snmp1*) is necessary for lipid uptake in the PG, downstream of *Smt3* function. We also show that SUMO is required for *ftz-f1* expression and, in addition, Ftz-f1 is modified by SUMO *in vitro* and *in vivo*. More importantly, reduced levels of Ftz-f1 in the PG leads to impaired pupariation with reduced levels of lipid droplets, similar to the *smt3* knockdown phenotype. Conversely, overexpression of *ftz-f1* is able to rescue *Snmp1* expression in *smt3* knockdown PGs. Finally, extending our observations in the PG, we saw that *Smt3*, Ftz-f1 and the Scavenger Receptors have a role in lipid uptake during ovarian steroidogenesis. Our results suggest similar requirements for cholesterol uptake in various steroidogenic tissues.

## Results

### *ftz-f1* knockdown in the PG phenocopies *smt3i* phenotype

In *Drosophila*, *ftz-f1* encodes for two protein isoforms with distinct temporal expression patterns:  $\alpha$ Ftz-f1 expressed early in embryogenesis and  $\beta$ Ftz-f1 expressed later in embryogenesis and during larval, prepupal and early pupal stages [27,28].  $\beta$ Ftz-f1 has previously been implicated in regulating ecdysteroid titers during post-embryonic development, specifically at the prepupa to pupa transition [26,28]. To investigate whether Ftz-f1 contributes to the *smt3* knockdown phenotype (herein referred to as *smt3i*), we silenced both isoforms of *ftz-f1* in the PG using *UAS-ftz-f1i* lines and the *phm-Gal4* driver. The resulting larvae will be referred to as *ftz-f1i*. Reduced levels of *ftz-f1* led to arrested development at larval stages (Figure 1A, 1B). Similar to the *smt3i* phenotype, *ftz-f1i* larvae arrested at third instar (L3) before pupariation, as shown by the mouth hook morphology (Figure 1B). These larvae did not pupariate and survived as L3 for several weeks. In contrast to the *smt3i* phenotype, we also observed larvae that arrested development at the transition from the second instar (L2) to L3, as shown by the double mouth hooks. These larvae die at 120 hours after egg laying (AEL; Figure 1B). The two larval phenotypes could reflect the silencing of the two *ftz-f1* isoforms.

The developmental arrest at L3 suggested that *ftz-f1i* larvae were not able to synthesize normal levels of ecdysteroids at the onset of pupariation. Accordingly, and similarly to other low ecdysteroid mutants including the *smt3i* larvae, *ftz-f1i* larvae fed with exogenous 20E pupariated (Figure 1C).

*smt3i* PG cells show a reduction in lipid droplets and sterol levels, in addition to changes in steroidogenic enzymes and transcription factors [7]. *ftz-f1i* PGs also showed reduced levels of lipid droplets per cell (Figure 1D, 1E), as well as reduced levels of the steroidogenic enzyme *Dib* (data not shown). Taken together, these results show that Ftz-f1 is required in the PG at the end of L3 to acquire appropriate levels of cholesterol and to process it into ecdysone.

### Regulation of Ftz-f1 by SUMOylation

It was previously reported that Ftz-f1 protein is reduced in *smt3i* PGs [7], which could explain why *ftz-f1* silencing phenocopies SUMO downregulation. SUMO could be necessary for *ftz-f1* transcription, for Ftz-f1 protein modification, or both. To clarify this point we analyzed *ftz-f1* expression in PGs from 120 hours AEL blue-gut wandering larvae (i.e. 5–12 hours before pupariation), and 120 hours AEL clear-gut larvae (i.e. 1–6 hours before pupariation). *ftz-f1* transcription is upregulated in clear-gut larvae compared to blue-gut (Figure 1F, 1G). However, *ftz-f1* expression is lower in *smt3i* PGs and it does not get upregulated in older larvae (Figure 1H, 1I). This indicates that SUMO is involved in *ftz-f1* transcriptional regulation.

It has been reported that the mammalian homologues of Ftz-f1 are modified by SUMOylation [14,18–21]. Therefore, we decided to test whether Ftz-f1 can be modified by SUMO. We determined the potential SUMOylation sites in Ftz-f1 using the SUMOplot analysis program and the Phosida Posttranslational Modification Database (Figure 1J). The two isoforms share the C-terminal region, but contain different N-terminal regions (Figure 1J). The *in silico* analysis showed that  $\alpha$ Ftz-f1 and  $\beta$ Ftz-f1 share four SUMO consensus sequences, all of them conserved among insects, of which three have high prediction scores (Figure 1J and data not shown). The SUMOylation consensus sites are located in the DNA binding domain, in the hinge region and two of them in the ligand binding domain (Figure 1J and Figure S1). Those located in the

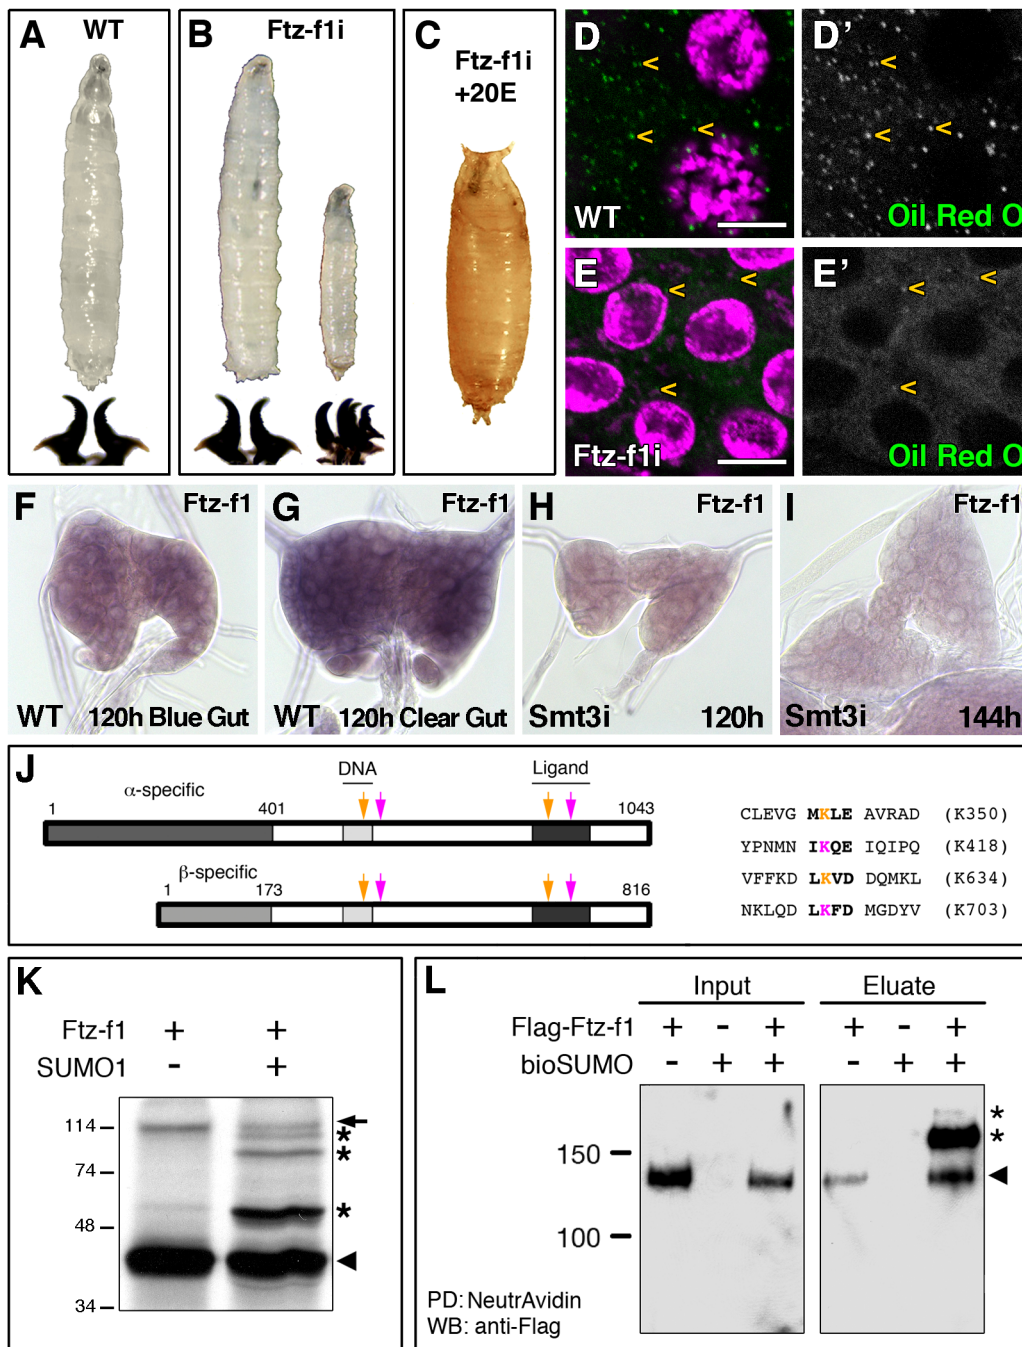

**Figure 1. Ftz-f1 is required for pupariation and lipid uptake and is modified by SUMOylation *in vivo* and *in vitro*.** (A) Wild type (WT) L3 larva and mouth hooks. (B) Most of the *phm-Gal4>UAS-ftz-f1 RNAi (ftz-f1i)* larvae arrested development at L3, while some of them stop at L2–L3 transition, as shown by the mouth hook morphology. (C) L3 *ftz-f1i* larvae fed with 20E were able to pupariate. (D, E) Single plane confocal micrographs showing nuclei marked with DAPI (purple) and lipid droplets, indicated by yellow arrowheads, stained with Oil Red O (green) in L3 control (D) and *ftz-f1i* PGs (E). (D', E') Single green channels are shown in black and white. L3 *ftz-f1i* PG cells contained reduced number of lipid droplets. All pictures were taken under the same intensity settings. Scale bars indicate 10  $\mu$ m. (F–I) Micrographs of *ftz-f1* mRNA *in situ* hybridization in PGs from WT (F, G) or *phm-Gal4>UAS-smt3 RNAi (smt3i)* larvae (H, I) at the indicated hours AEL. *ftz-f1* expression increases in clear-gut respect to blue-gut larvae (G versus F, respectively). In *smt3i* larvae *ftz-f1* expression is downregulated (H, I). All the *in situ* reactions were stopped at the same time and pictures were taken at the same magnification. (J) Schematic representation of  $\alpha$ - and  $\beta$ Ftz-f1 isoforms indicating the predicted SUMOylation sites (arrows) and the sequences for the high-scoring sites found in Ftz-f1. Pink arrows indicate the SUMOylation sites conserved in insects and orange arrows the SUMOylation sites conserved from insects to vertebrate NR5A2. Pink and orange Ks indicate the lysines where SUMO attachment could take place. Numbering is based on the  $\beta$ Ftz-f1 isoform. (K) *In vitro* SUMOylation assay. Incubation of the Ftz-f1 protein in the presence (+) of SUMO1 changes the motility of the protein (asterisks). Arrowhead indicates the unmodified protein and arrow indicates an unspecific band. Molecular weight markers are shown to the left. (L) *In vivo* SUMOylation assay. S2R+ cell extracts containing the indicated plasmids are shown. Arrowhead indicates the unmodified Ftz-f1 protein, while the asterisks indicate the high molecular weight SUMOylated forms. Input and eluate of the pull down reaction (PD) are shown. Note that the unmodified protein interacts with the NeutrAvidin beads (arrowhead). doi:10.1371/journal.pgen.1003473.g001

DNA binding domain and in the ligand binding domain, are conserved between insects and NR5A2 (LRH-1) but not NR5A1 (SF-1; Figure 1J and Figure S1).

Using an *in vitro* SUMOylation assay, our results showed that Ftz-f1 protein is modified in the presence of SUMO, appearing as additional slow-migrating bands (Figure 1K). In order to analyze whether Ftz-f1 can also be SUMOylated *in vivo*, we developed a SUMOylation assay in cultured *Drosophila* cells. Smt3 was expressed as a fusion with a biotinylation-target peptide (bio-SUMO, see Materials and Methods), along with Ftz-f1 and BirA enzyme. In this assay, biotinylated SUMO-conjugated proteins were bound to NeutrAvidin beads allowing for the specific isolation of SUMOylated material. Our results show that full-length  $\alpha$ Ftz-f1 is SUMOylated in *Drosophila* S2R+ cells (Figure 1L), with the estimated molecular weight for the main band (low asterisk) corresponding to the addition of one bioSUMO moiety. An additional but weaker band was observed at a higher molecular weight (upper asterisk in Figure 1L), suggesting the possibility that Ftz-f1 could also be modified by more than one bioSUMO moiety *in vivo*.

Taken together, these results show that SUMOylation regulates Ftz-f1 in two ways. On one hand, it is necessary for *ftz-f1* expression and, on the other hand, the protein Ftz-f1 is modified by SUMO *in vitro* and *in vivo*, suggesting that the post-translational modification of Ftz-f1 could potentially contribute to Ftz-f1 function in the PG.

### SR-BIs expression is regulated by Smt3 and Ftz-f1 in PG cells

The CD36 family of Scavenger Receptors is necessary for lipid uptake in various mammalian cell types [29]. We hypothesized that members of this family could be necessary for sterol uptake in the PG and could mediate some of the functions of Smt3 and/or Ftz-f1. Fourteen members of the CD36 family were identified in *Drosophila melanogaster* [30]. By *in situ* hybridization it was recently shown that three of these receptors, *peste* (*pes*), *croquemort* (*crq*) and *Snmp1* were upregulated in the PG at the onset of pupariation [31]. We confirmed this upregulation by quantitative real-time PCR (qPCR) of cDNA samples from precisely staged PGs at 96 hours AEL, 120 hours AEL blue-gut wandering larvae and 120 hours AEL clear-gut larvae (Figure 2A).

By immunostaining using specific antibodies we observed that Snmp1 was expressed in *Drosophila* PG cells at 120 hours AEL (Figure 2B, 2C). Interestingly, Snmp1 expression was upregulated from L3 blue-gut (Figure 2B) to L3 clear-gut larvae (Figure 2C). The same results were observed when antibodies against Crq were used (Figure 2D, 2E), suggesting a requirement for high levels of the Scavenger Receptors at the end of L3. The Scavengers expression upregulation from blue- to clear-gut larvae coincides with an increase in the content of lipid droplets of the clear-gut PGs (Figure 2F, 2G).

As reported previously, the expression of Snmp1 is upregulated at the level of mRNA from blue- to clear-gut larvae (Figure 3A, 3B) [31]. Interestingly, we observed that the levels of expression of *Snmp1* are reduced, and are not upregulated, in *smt3i* PGs (Figure 3C, 3D). Similar results were obtained when specific antisense probe for *crq* was used (Figure S2A–S2D). However, *pes* expression is still present in *smt3i* PGs (Figure S2E–S2H), indicating different regulatory requirement for *pes* respect to *crq* and *Snmp1*.

At the level of proteins, we observed that Snmp1 expression was reduced in *smt3i* and in *ftz-f1i* PG cells (Figure 3E, 3F, 3G). Although basal levels of expression were evident in *smt3i* 120 hours larvae (Figure 3E), the upregulation of Snmp1 in *smt3i* PGs was

never observed, even when we analyzed 144 hours AEL larvae (Figure 3F, compare to Figure 2C). The same results were observed when anti-Crq antibodies were used (Figure 3H, compare to Figure 2E).

These results indicate that SR-BIs are downstream of Smt3 and Ftz-f1 in the PG and suggest that SR-BIs might be required to mediate the role of Smt3 and Ftz-f1 in steroidogenesis during the larval to pupal transition.

### SR-BIs silencing in the PG phenocopies *smt3i* and *ftz-f1i* L3 developmental arrest

To test the implication of the three *Drosophila* SR-BI members expressed in the PG in cholesterol uptake and steroidogenesis, we used the *phm-Gal4* line to silence *crq*, *pes* or *Snmp1* specifically in the PG. Interestingly, at 25°C *Snmp1* knockdown in the PG (herein called *Snmp1i*) led to L3 developmental arrest (Figure 4B). The *Snmp1i* L3 larvae survived for approximately ten days, darkened in the anterior part but failed to form a cuticle, the pseudo-pupae dying at this stage (Figure 4B). Unlike *smt3i* or *ftz-f1i*, the long-lived *Snmp1i* larvae had normal levels of expression of the cytochrome P450 enzyme Dib, indicating that the receptor does not have a major role in regulating this steroidogenic enzyme (Figure 4D, 4E). However, similarly to *smt3i* and *ftz-f1i*, *Snmp1i* PGs had a reduced content of lipid droplets, reaching between 5 to 16% of droplets per cell in comparison to controls (Figure 4C, 4F, 4G). Intriguingly, these droplets were abnormally big, being about three times bigger in *Snmp1i* cells compared to controls (Figure 4C, 4F, 4G). When *Snmp1i* L3 larvae were fed with exogenous 20E, 100% of the animals pupariated, and 66% led to adult flies (n = 30).

In contrast, knockdown of *crq* or *pes* in the PG at 25°C did not lead to any obvious phenotype. However, we observed L3 developmental arrest when silencing *pes* at 29°C (data not shown). Also in this case, the lipid droplets in the PG were less in number and larger in size than in controls (data not shown), which suggest that these receptors are involved in lipid uptake as well as in lipid droplet mobilization and/or the control of lipid droplets size.

### Smt3 is involved in lipid uptake in ovarian follicle cells

Besides PG, we wondered whether the molecular mechanism of lipid transport would be conserved in other steroidogenic tissues. The ovary is one of the sources of ecdysteroids in female adult insects. In cockroaches and locusts it has been shown that the follicle cells can synthesize and secrete ecdysone [32–34]. In *Drosophila*, *in vitro* synthesis and secretion of ecdysteroids has also been described in the ovary [35,36]. *smt3* and other SUMOylation genes are expressed during oogenesis in *Drosophila* [37]. We examined Smt3 protein expression, which was localized mainly to the nucleus, and observed the highest levels in the germarium and in the follicle cells at stages 2–8 egg chambers, with weaker expression also evident in nurse cells at these stages (Figure 5A, 5B). At later stages of oogenesis, Smt3 expression in the follicle and nurse cells was maintained (data not shown). To ask whether the Smt3 requirement for sterol uptake is a common feature for steroidogenic tissues, we silenced *smt3* in the follicle cells using *UAS-smt3i* lines and the follicle-specific *T155-Gal4* driver (Figure 5C) [38].

The ovary expresses several members of the cytochrome P450 enzyme family involved in ecdysteroid synthesis such as Phm, Dib, Shadow, Shade, Neverland and Dare [39–43]. We have focused our study from stage 8 until stage 10–11 of oogenesis, when the highest expression levels of these enzymes have been observed. In control female ovaries Dib expression started at stage 8 in the follicle cells, with the highest levels at stages 9–10, in correlation

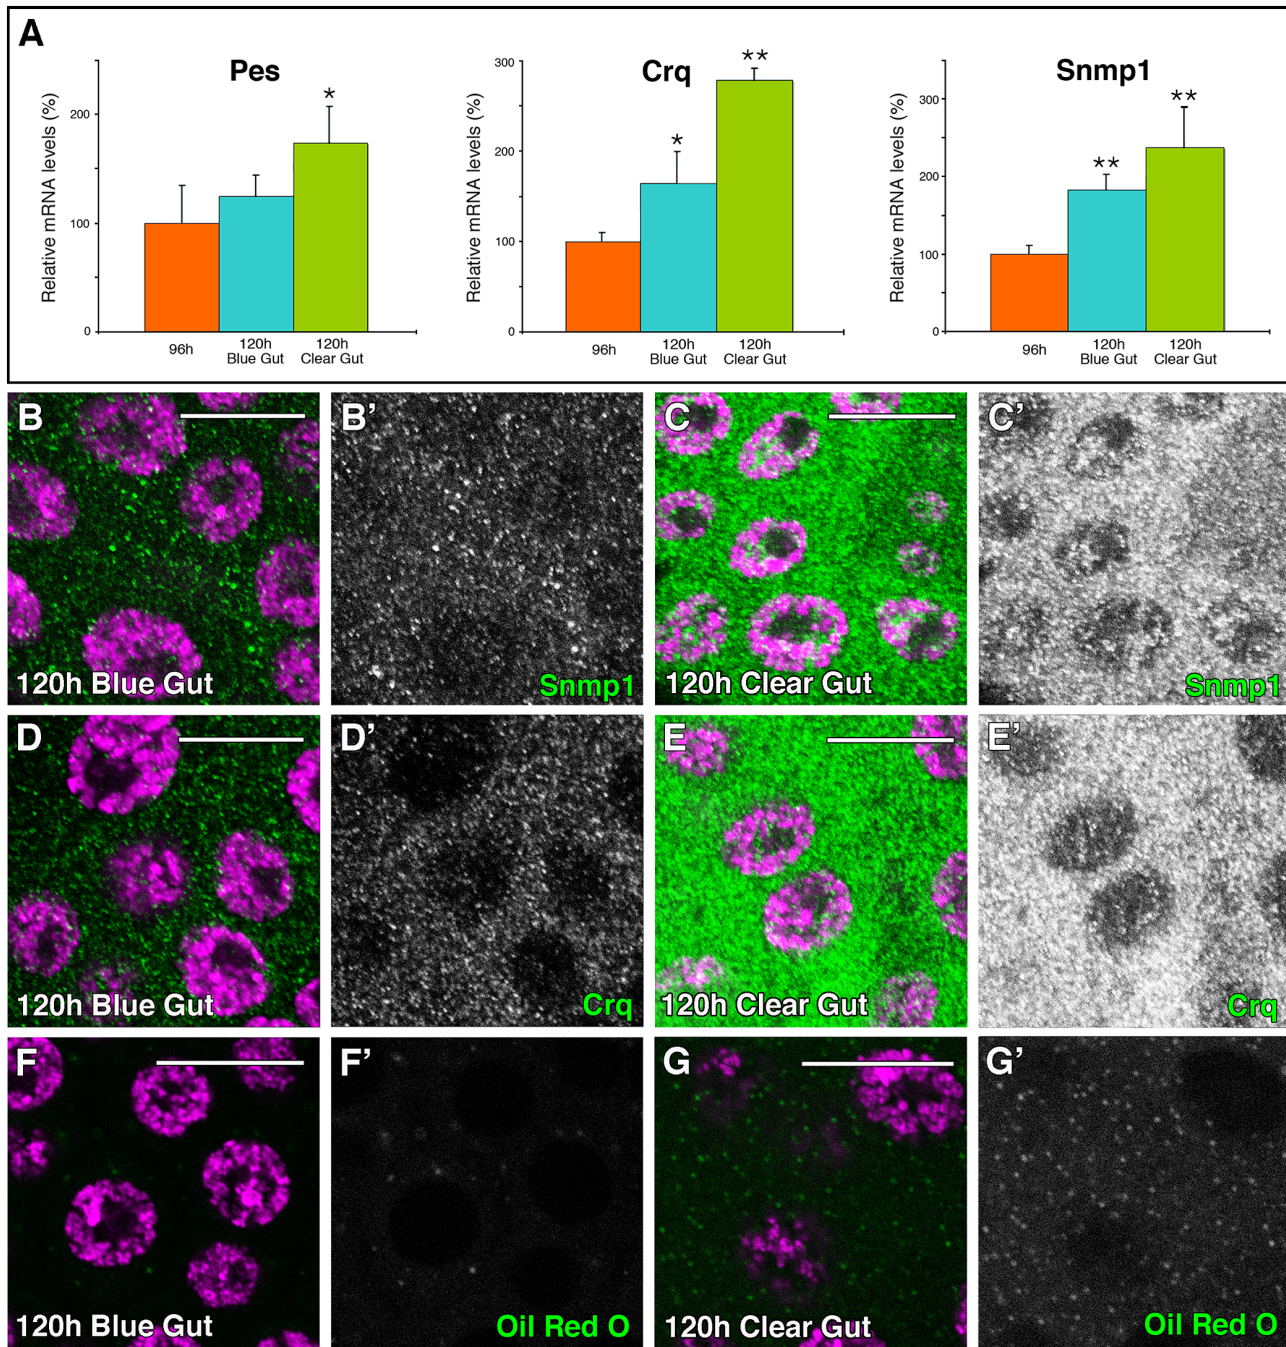

**Figure 2. SR-BIs expression and lipid uptake is upregulated at late L3.** (A) Graphical representation of the qPCR results showing the upregulation of the *Drosophila* SR-BI members *pes*, *crq* and *snmp1* from 96 hours AEL to 120 hours AEL blue-gut and 120 hours AEL clear-gut larvae. Error bars indicate standard deviation. One asterisk ( $p < 0.001$ ) and two asterisks ( $p < 0.0001$ ) indicate significant upregulation respect to 96 hours larvae. (B–G) Single plane confocal micrographs taken under the same intensity settings. Nuclei are marked with DAPI (purple). (B–C) Expression of Snmp1 (green) is upregulated in WT PGs from 120 hours AEL blue-gut larvae (B) to 120 hours AEL clear-gut larvae (C). (D–E) Crq expression (green) is upregulated in WT PGs from 120 hours AEL blue-gut larvae (D) to 120 hours AEL clear-gut larvae (E). (F, G) The number of lipid droplets shows simultaneous increase in the PGs during the same time, as shown by Oil Red O staining (green). (B'–G') Single green channel are shown in black and white. Scale bars indicate 20  $\mu\text{m}$ . doi:10.1371/journal.pgen.1003473.g002

with the peak of ecdysone synthesis in the ovary (Figure 5D and data not shown) [44,45]. Similarly to what happens in the PG [7], the expression levels of Dib in *smt3* knockdown follicle cells were drastically reduced (Figure 5E). In addition, Ftz-f1, which was expressed both in nurse and follicle cells, was also reduced in the *smt3* silenced follicle cells (Figure 5F, 5G), as shown in the PG [7].

At the stages analyzed, the follicle and nurse cells and the oocyte show high number of lipid droplets (Figure 6A). Interestingly, we observed a strong reduction in the number of lipid droplets in *smt3i* follicle cells, which correlate with the observations shown in the PG (Figure 6B and data not shown). However, the oocyte was not completely depleted of lipids as it received lipids from the nurse

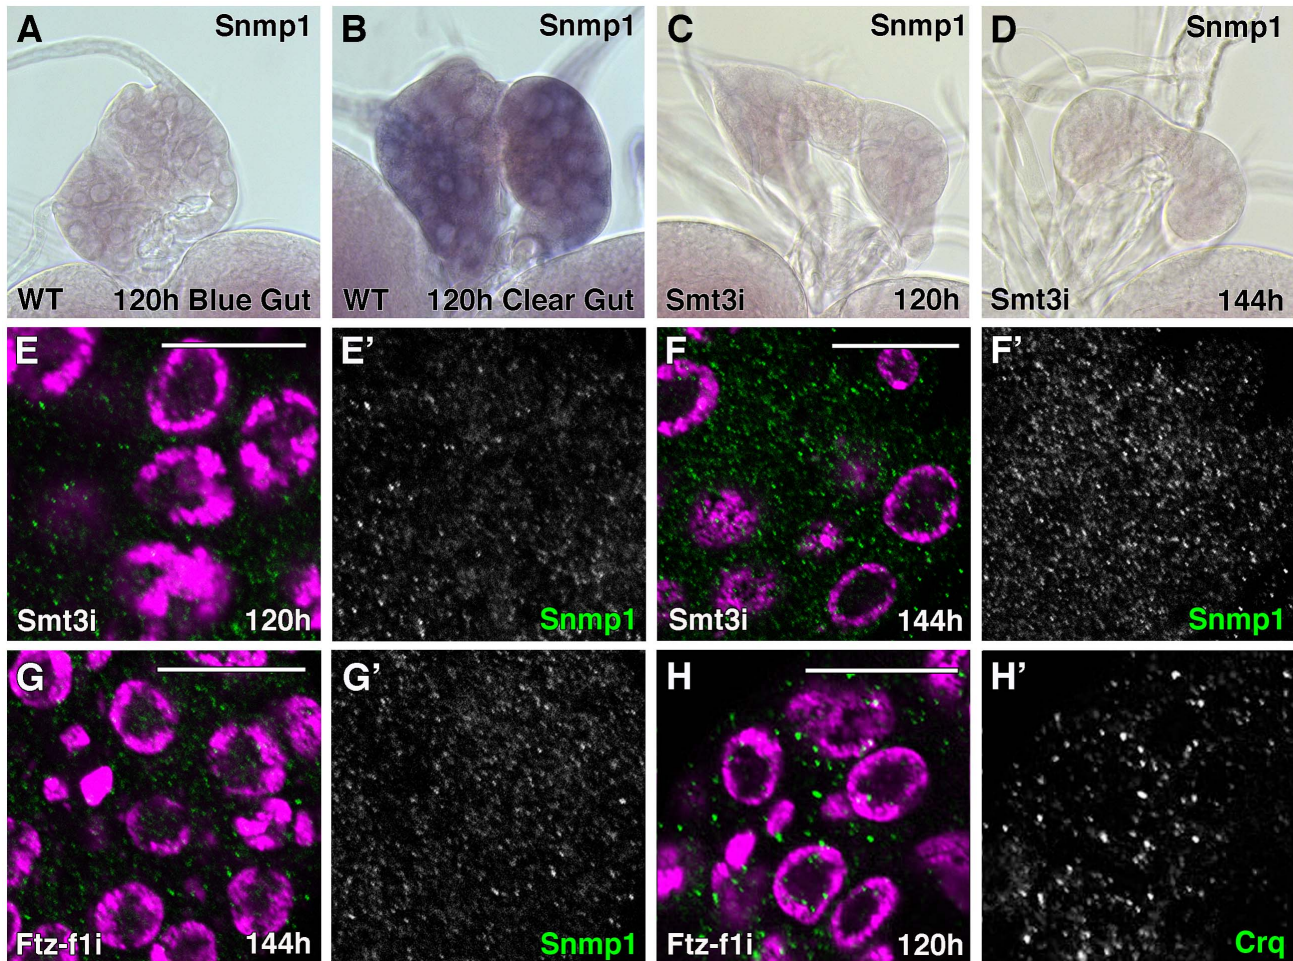

**Figure 3. Expression of SR-BIs is reduced in *smt3i* and *ftz-f1i* PG cells.** (A–D) Micrographs of *Snmp1* mRNA *in situ* hybridization in PGs from WT (A, B) or *phm-Gal4>UAS-smt3 RNAi* (*smt3i*) larvae (C, D) at the indicated hours AEL. *Snmp1* mRNA is upregulated in WT clear-gut larvae (B, compare with A). However, no expression is visible in *smt3i* PGs (C, D). All the *in situ* reactions were stopped at the same time and pictures were taken at the same magnification. (E–H) Single plane confocal micrographs taken under the same intensity settings. Nuclei are marked with DAPI (purple) and *Snmp1* (E–G) or *Crq* (H) are shown in green. (E, F) *smt3i* PG cells have basal but reduced levels of *Snmp1* at 120 hours AEL larvae (compare to WT in Figure 2B) but they do not upregulate SR-BIs expression at 120–144 hours AEL larvae. (G, H) *ftz-f1i* PG cells show *Snmp1* (G) or *Crq* (H) expression highly reduced compared to Figure 2C or 2E, respectively. (E'–H') Single green channels are presented in black and white. Scale bars indicate 20  $\mu$ m. doi:10.1371/journal.pgen.1003473.g003

cells throughout the ring canals (Figure S3A), which might explain why these oocytes are able to give rise to viable embryos. The reduction of Ftz-f1 levels in the follicle cells produced a more severe phenotype with death of many ovarioles. However, those that survived showed also a reduction in the number of lipid droplets in the follicle cells, this reduction being not as strong as in the *smt3i* phenotype (Figure 6C).

To follow up our observations in the PG, we analyzed whether the SR-BI family could be involved in the lipid uptake in the ovary. Indeed, we observed that *Snmp1* knockdown in the follicle cells clearly reduced the lipid droplet content in these cells (Figure 6D). Interestingly, the few droplets observed in some cells were located in the basal part, suggesting a mobilization impairment of droplets from the basal to the apical surface of follicle cells (Figure S3B).

During the stages 8–10 of oogenesis, follicle cells accumulate over the oocyte and become columnar, showing numerous microvilli on their apical surface [46]. These microvilli can be detected by the expression of Cad99C, a cadherin involved in the

regulation of the microvilli length [47,48]. We detected Cad99C protein on the apical plasma membrane of the follicle cells surrounding the oocyte (Figure 6E). However, in *smt3i* follicle cells Cad99C expression was highly reduced, which suggests a microvilli malformation in these cells (Figure 6F). DE-Cad, which marks adherent junctions and is required for centripetal cell migration, was also greatly reduced in *smt3i* follicle cells (Figure 6G, 6H) [49]. We observed a slight delay in the centripetal migration of follicle cells and very small gaps in the vitelline membrane that might be attributed to the reduction in the expression level of cadherins (data not shown). Even with these changes, egg fertility was only slightly affected and viable embryos were obtained.

These results show that reduced levels of Smt3 in follicle cells affect the levels of Dlb and Ftz-f1, alter lipid droplet size and distribution, and affect membrane surface area (in this case, by altering microvilli), suggesting that Smt3 performs parallel functions in the PG and in the ovary. Moreover, *Snmp1* could play similar roles in lipid uptake and mobilization in the PG and in the follicle cells.

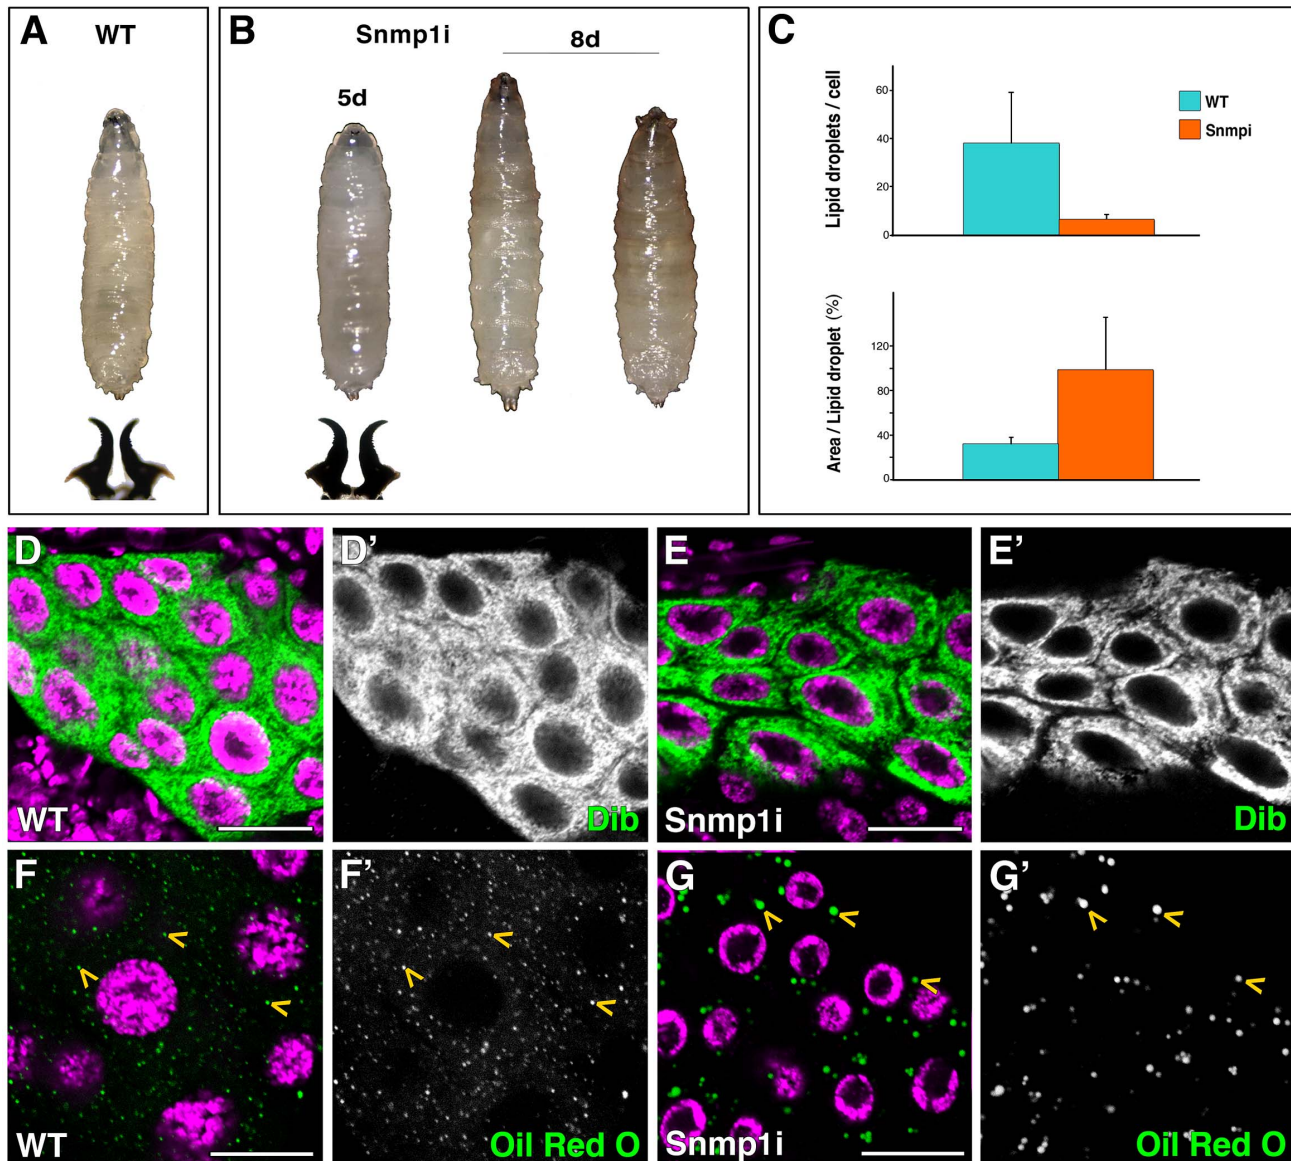

**Figure 4. *Snmp1* is required in the PG for pupariation and lipid uptake.** (A) Wild type (WT) L3 larva and mouth hooks. (B) *phm-Gal4>UAS-Snmp1 RNAi* (*Snmp1i*) larvae arrested development at L3, as shown by morphology of mouth hooks, and were able to survive for several days. (C) Graphical representation of the average number of lipid droplets per cell and the area per lipid droplet in WT versus *Snmp1i* PG cells. (D–G) Single plane confocal micrographs taken under the same intensity settings. Nuclei are marked with DAPI (purple). (D, E) DIB expression is similar in WT (D) and *Snmp1i* PG cells (E). (F–G) Oil Red O staining shows the lipid droplets (yellow arrowheads) content in WT (F) and *Snmp1i* PG cells (G). Note that the number of lipid droplets was highly reduced, while the size of the lipid droplet was larger in *Snmp1i* compared to control PG cells. (D'–G') Single green channels are shown in black and white. Scale bars indicate 20  $\mu\text{m}$ . doi:10.1371/journal.pgen.1003473.g004

### *Snmp1* restores the lipid droplet content of *smt3* knockdown in PG and follicle cells

Our results showed that silencing *Snmp1* phenocopies the impairment of lipid uptake of *smt3* or *ftz-f1* knockdowns. To test the role of *Snmp1* in the *smt3i* phenotype in the PG, we overexpressed *Snmp1* in an *smt3i* background. Interestingly, we observed the rescue of the number of lipid droplets per cell in 51% of the larvae ( $n = 29$ ; Figure 7A, 7B). The lipid droplets were comparable to the controls in size, indicating that the overexpression of *Snmp1* was able to restore the uptake of lipids and their mobilization in the PG. Furthermore, *Snmp1* was able to rescue the lipid droplets content in *smt3i* follicle cells (Figure 7C). These

results demonstrate the role of *Snmp1* in sterol uptake in both the PG and the ovary and underline the relevance of the *Drosophila* SR-BI family in steroidogenesis.

### SUMOylation of Ftz-f1 modulates *Snmp1* expression

Our results suggest that SR-BIs are downstream of Ftz-f1. To study whether *Snmp1* transcription is mediated, at least in part, by Ftz-f1 we analyzed its promoter region. Interestingly, the *Snmp1* locus contains two putative Ftz-f1 binding sites (TCAAGGTgG, position  $-1410$  from the initial methionine; CCAAGGgCA, position  $+1666$ ) that only differ in one nucleotide from the consensus sequence 5'-PyCAAGGPyCPu-3'. In addition, an

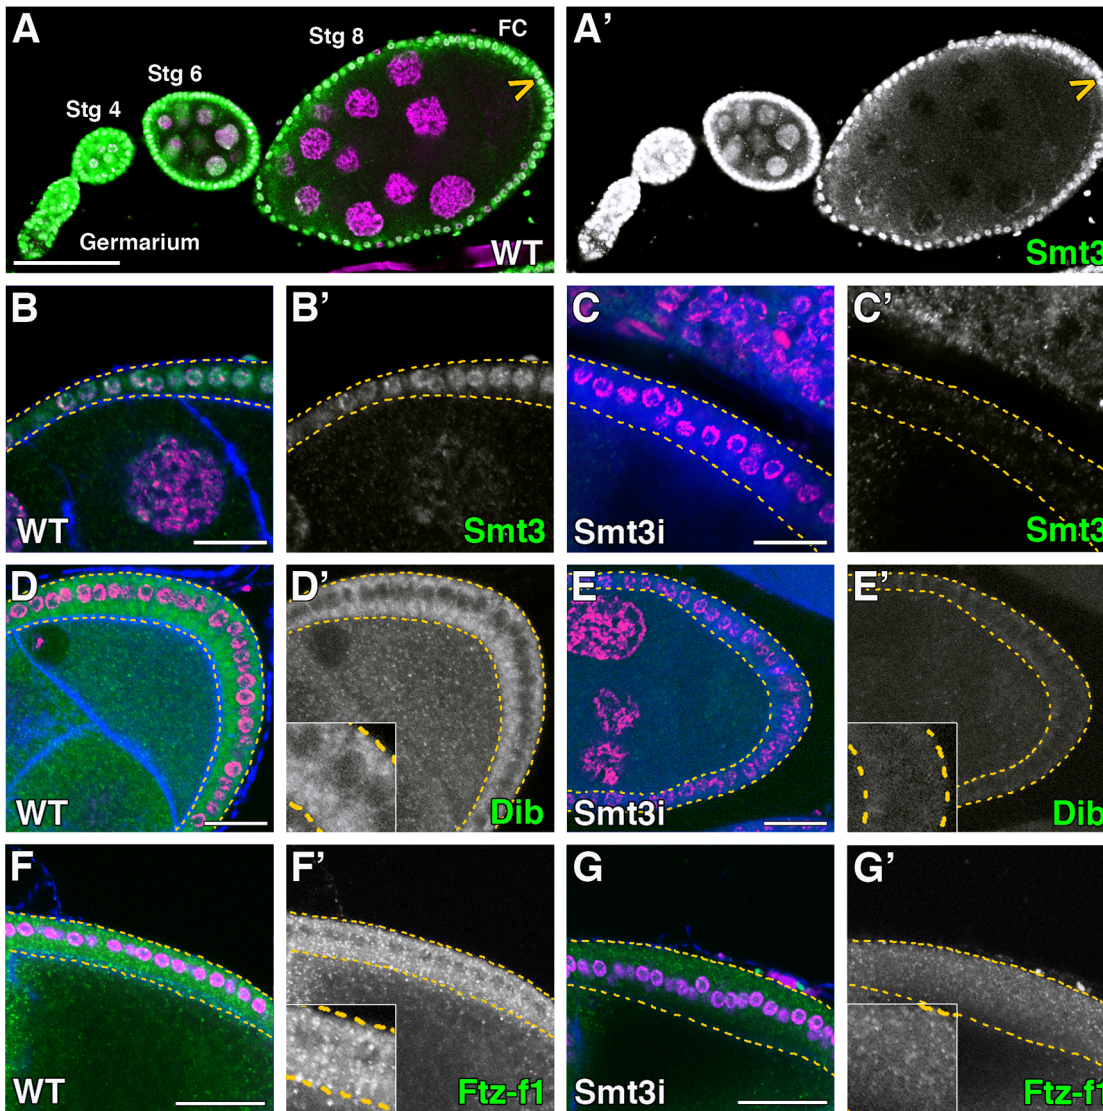

**Figure 5. Smt3 is necessary for the expression of Dib and Ftz-f1 in follicle cells.** (A–G) Single plane confocal micrographs were taken under the same intensity settings in *smt3* knockdown and control ovaries. Nuclei are labelled with DAPI (purple). F-actin cytoskeleton is shown in blue in B, D, F and G. GFP is shown in blue in C and E. Follicle cells are indicated by yellow dotted lines in B–G. (A'–G') Single green channels are shown in black and white. Close-up of the follicle cells are shown in insets in D'–G'. Scale bars indicate 20  $\mu$ m. (A) Expression of Smt3 (green) in the *Drosophila* germarium and egg chambers. Arrowhead points to follicle cells (FC). (B–C) Smt3 (green) expression levels in follicle cells in *T155-Gal4>UAS-GFP;UAS-smt3i* (Smt3i) (C) is severely reduced compared with the control (B). (D–G) Stage 8 and early stage 9 egg chambers showing in green the expression of Dib (D, E) or Ftz-f1 (F, G) in *T155-Gal4>UAS-GFP;UAS-smt3i* or *T155-Gal4>UAS-smt3i* (E, G) compared with the controls (D, F). doi:10.1371/journal.pgen.1003473.g005

atypical SF-1 binding site (TttGGGCCA, position –1974) that contains the core of the consensus sequence TCAGGGCCA [50], is present in the promoter and could also be implicated in *Smp1* regulation. We examined whether Ftz-f1 could activate *Smp1* transcription using a reporter gene cloned downstream of a 2 Kb fragment located at 5' of the *Smp1* transcription initiation point. Interestingly,  $\alpha$  and  $\beta$ Ftz-f1 activated luciferase activity significantly in S2R+ *Drosophila* cells (Figure 8A). A mutation in position –1971, which eliminates the atypical SF-1 binding site reduces luciferase activity in presence of  $\alpha$ Ftz-f1 (Figure 8B), suggesting that activation depends of Ftz-f1 binding to that site.

Fusions of SUMO with the protein of interest can be used as a model of constitutive SUMOylation without the pleiotropic effects of overexpressing SUMO in the cells [51]. In addition, fusions of Ubc9, the E2 SUMO conjugating enzyme, are also used successfully as

model for constitutive SUMOylation [52]. To examine the effect of Ftz-f1 modification on *Smp1* activation, we analyzed the transcriptional activity of Smt3- $\beta$ Ftz-f1 and Smt3- $\alpha$ Ftz-f1 fusion proteins (Figure 8A). Cotransfection assays showed that while  $\alpha$  or  $\beta$ Ftz-f1 were able to increase the luciferase activity compared with the control vector, Smt3- $\alpha$ Ftz-f1 or Smt3- $\beta$ Ftz-f1 caused a reduction in the level of transcription (Figure 8A). This effect was reproduced using the Ftz-f1 proteins fused to Lesswright, the *Drosophila* homologue to Ubc9 (data not shown). These results suggest that SUMOylation reduces Ftz-f1 activation capacity on *Smp1*.

According to our previous data, *ftz-f1* expression depends on SUMO. In turn, *Smp1* expression depends of Ftz-f1. In fact,  $\alpha$  or  $\beta$ Ftz-f1 overexpression in the PG rescues *Smp1* expression in an *smt3i* background in 100% of the PGs analyzed ( $n = 37$  and  $n = 36$ , respectively; Figure 8C, 8E, 8G, compare with Figure 3E). We



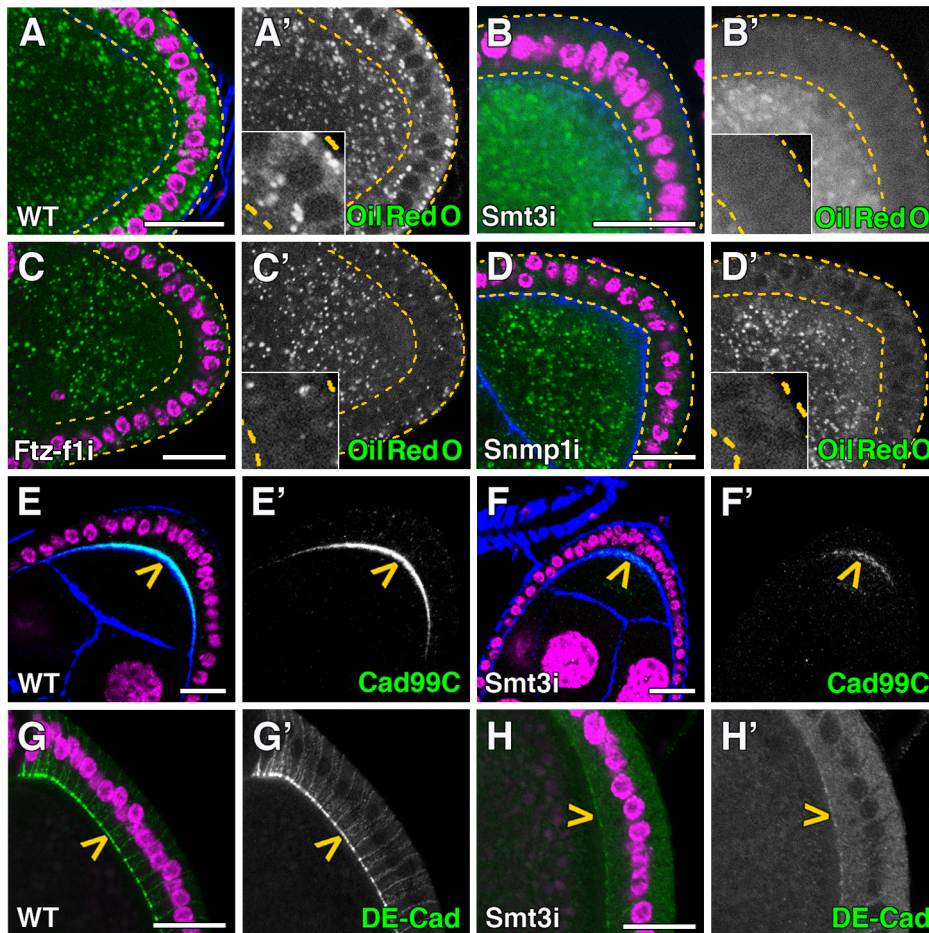

**Figure 6. Smt3 and Snmp1 are necessary for lipid uptake in follicle cells.** (A–H) Single plane confocal micrographs taken under the same intensity settings. Nuclei are labelled with DAPI (purple). F-actin cytoskeleton is shown in blue. Follicle cells are indicated by yellow dotted lines. (A'–H') Single green channels are shown in black and white. Close-up of the follicle cells are shown in insets in A'–D'. Scale bars indicate 20  $\mu\text{m}$ . (A–D) Lipid droplets shown by Oil Red O staining (green) in follicle cells of WT (A), *T155-Gal4>UAS-smt3i* (B), *T155-Gal4>UAS-ftz-f1i* (C) or *T155-Gal4>UAS-Snmp1i* (D) adults. (E, F) Cad99C (green; yellow arrowheads) is very much reduced in *T155-Gal4>UAS-smt3i* (F) respect to WT (E). (G, H) DE-Cad (green; yellow arrowheads) is also reduced in *T155-Gal4>UAS-smt3i* (H) respect to WT (G). doi:10.1371/journal.pgen.1003473.g006

then examined *in vivo* the differences of activity between  $\alpha$  or  $\beta$ Ftz-f1 and Smt3- $\alpha$  or Smt3- $\beta$ Ftz-f1. Smt3- $\alpha$ Ftz-f1 or Smt3- $\beta$ Ftz-f1 overexpression only recovered Snmp1 expression in 8 or 25% of the PGs, respectively ( $n=25$  and  $n=39$ ; Figure 8D, 8F, 8G), suggesting a difference in the activity of Ftz-f1 depending on its SUMOylation status.

## Discussion

Here, we have investigated the effect of SUMOylation on SR-BI and Ftz-f1 activities in the context of steroidogenesis. We show that SUMOylation has a dual role on Ftz-f1 function. On one hand, *ftz-f1* transcription depends on SUMO. On the other hand, SUMO modifies Ftz-f1, reducing its capacity to activate Snmp1 transcription. In addition, we demonstrated that *Drosophila* SR-BI family is involved in steroidogenesis by regulating the cholesterol uptake in the PG required for the synthesis of ecdysone. Our results also show that Snmp1 is involved in cholesterol uptake, acting downstream of SUMO and Ftz-f1, and is able to recover the lipid content in *smt3i* PGs. Furthermore, we showed that SUMO and the Scavenger Receptors are also involved in lipid capture and mobilization in the ovarian follicle cells.

## SUMOylation in steroidogenesis

SUMO modification, a highly conserved pathway throughout evolution, is known to impact the activity, interactions, localization and stability of proteins [53]. A number of studies during the last years have clearly established the essential role of SUMOylation during development. In *Drosophila melanogaster*, the single SUMO protein Smt3 is expressed during development and is highly enriched during embryogenesis and in adult females [54–56]. At later stages it is predominantly expressed in the central nervous system and in the gonads [37,56,57]. Components of the *Drosophila* SUMO conjugation pathway have also been implicated in diverse processes such as embryogenesis, wing morphogenesis, central nervous system development, neurodegeneration, photoreceptor development and immune response (reviewed in [58,59]). In addition, Smt3 is required in the PG for the correct function of the ecdysteroid biosynthetic pathway at the time of puparium formation, which derives from defects in cholesterol uptake and formation of intracellular channels [7]. We have now shown that Smt3 requirement for lipid uptake is a common feature for steroidogenic tissues by analyzing its function in the ovary, a tissue that also requires cholesterol for the synthesis of ecdysone. In addition, we show that SUMO is required to activate *ftz-f1* transcription. During the late

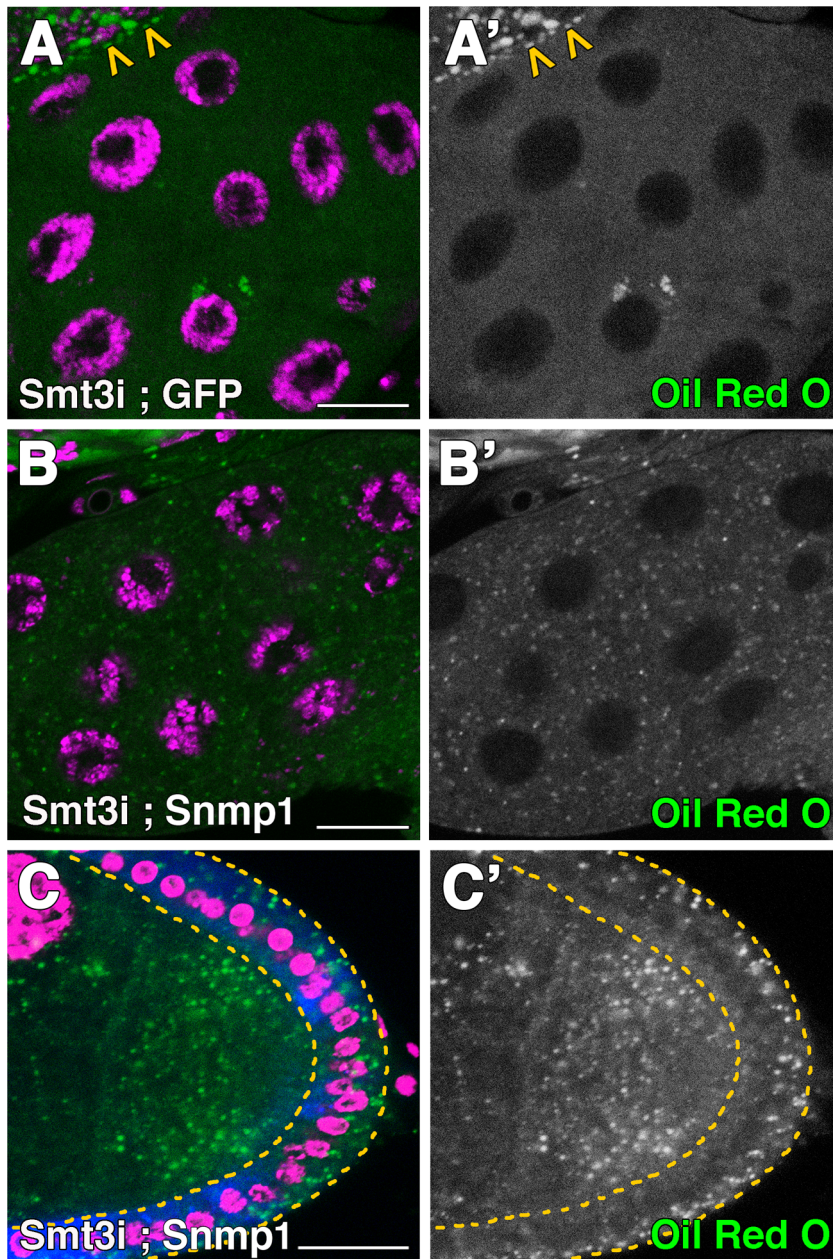

**Figure 7. Snmp1 restores the lipid droplets content in *smt3i* cells.** (A–B') Single plane confocal micrographs taken under the same intensity settings showing Oil Red O staining (green) in PGs of *phm-Gal4>UAS-GFP;UAS-smt3i* (A) or *phm-Gal4>UAS-Snmp1;UAS-smt3i* (B). Arrowheads in A indicate the brain hemisphere with normal levels of lipid droplets, as *smt3* was not silenced there. (C) Confocal micrograph showing Oil Red O staining (green) of follicle cells *T155-Gal4>UAS-Snmp1;UAS-smt3i*. GFP is shown in blue. Follicle cells are indicated by yellow dotted lines. (A'–C') Single green channels are shown in black and white. Nuclei are labelled with DAPI (purple). Scale bars indicate 20  $\mu$ m. doi:10.1371/journal.pgen.1003473.g007

larval pulse of ecdysone, the transcription factors E75, DHR3 and the Nitric Oxide Synthase (NOS) are known to regulate Ftz-f1 expression. Ftz-f1 is a direct target of DHR3 [60,61] and E75 suppresses this DHR3 mediated expression of  $\beta$ Ftz-f1 [62]. NO, produced by NOS, prevents the E75 function as suppressor of DHR3 [63]. Therefore, these factors could be responsible for the SUMO dependent *ftz-f1* transcriptional activation. Noteworthy, NOS is modified by SUMO [64,65] and its downregulation in the PG prevents pupariation [63]. An interesting question to be analyzed in the future will be the study of the biological role of NOS SUMOylation in the regulation of *ftz-f1* expression.

Although several *Drosophila* Smt3-modified proteins have been identified, the effect of SUMOylation remains unknown for most of them. A proteomic study in early *Drosophila* embryos identified 140 SUMOylation targets that confirmed the role of this pathway in Ras signaling, cell cycle and pattern formation [66]. Smt3 also regulates negatively JNK signaling through sequestering HipK in the nucleus [67]. Further identification of SUMO targets at different developmental stages will be particularly important. We are especially interested in PG proteins modified by SUMO during the larval-pupal transition since Smt3 function is required in this crucial developmental window. In that context, the SUMO

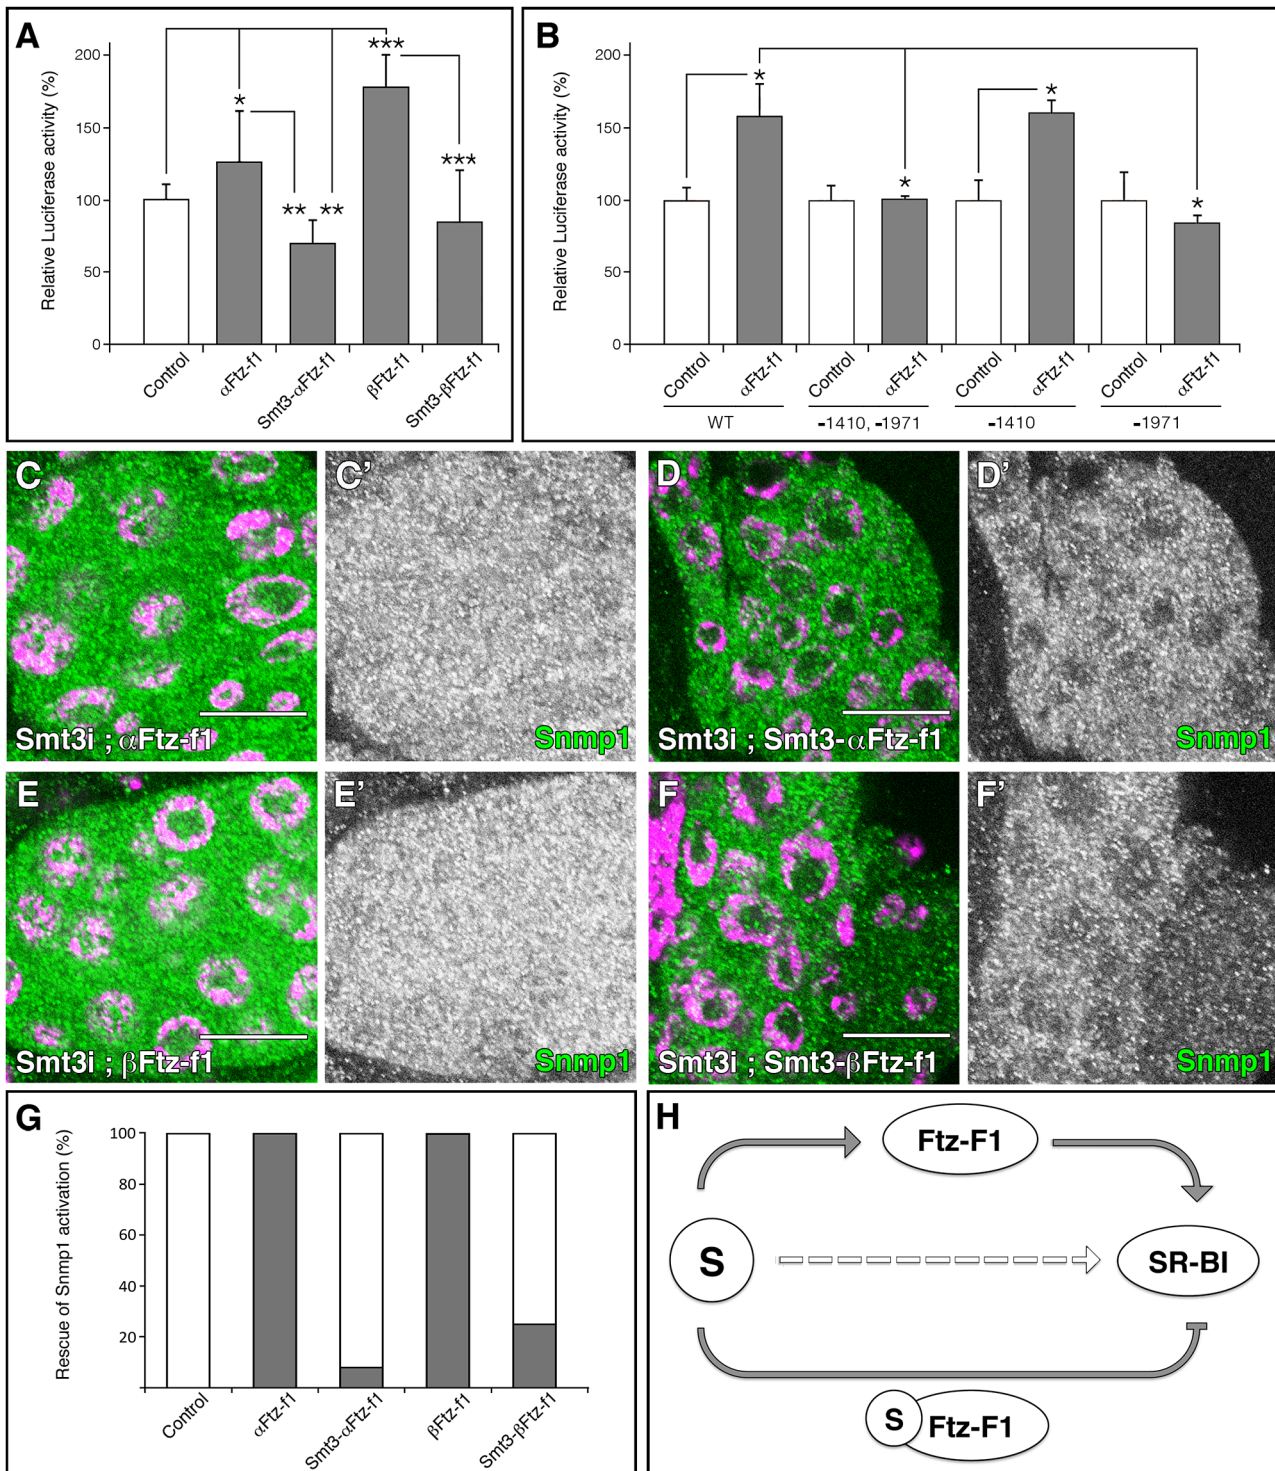

**Figure 8. SUMOylation of Ftz-f1 modulates Snmp1 expression.** (A, B) Graphical representations of the luciferase activity from WT *Snmp1-Luc* (A) or the indicated mutant vectors (B) cotransfected in S2R+ *Drosophila* cells with plasmids expressing the indicated proteins. As control, empty *pUASattB* vector was used. A single asterisk indicates  $p < 0.05$ , two asterisks  $p < 0.001$  and three asterisks  $p < 10^{-6}$ . (C-F) Single plane confocal micrographs taken under the same intensity settings showing Snmp1 staining (green) in PGs of *phm-Gal4>UAS-smt3i;UAS- $\alpha$ Ftz-f1* (C), *phm-Gal4>UAS-smt3i;UAS-Smt3- $\alpha$ Ftz-f1* (D), *phm-Gal4>UAS-smt3i;UAS- $\beta$ Ftz-f1* (E) or *phm-Gal4>UAS-smt3i;UAS-Smt3- $\beta$ Ftz-f1* (F). Nuclei are labelled with DAPI (purple). (C'–F') Single green channels are shown in black and white. Scale bars indicate 20  $\mu$ m. (G) Graphical representation of the proportion of PGs that show Snmp1 expression in an *smt3i* background (grey bars). White bars indicate no Snmp1 expression rescue. The transgenes used for the rescue experiments are indicated. (H) Schematic summary of the results, where S means Smt3. Grey arrows indicate the requirement of SUMOylation for Ftz-f1 and SR-BI expression, and the regulation of SR-BI by Ftz-f1 or Smt3-Ftz-f1. Broken open arrow indicates hypothesized posttranslational modification of Scavengers by Smt3.  
doi:10.1371/journal.pgen.1003473.g008

modification of *Drosophila* Ftz-f1 described here, to our knowledge, for the first time is particularly exciting. Ftz-f1 hypomorphic regulatory mutants show defects at the prepupal-pupal transition, such as failure of head eversion and salivary gland cell death, and suggest a function for this transcription factor in muscle contraction events at this transition [28,68,69].  $\beta$ Ftz-f1 expression in late first and second instar larvae and its role in molting has also been described in *Drosophila* and other insects [28,70,71]. However, the precise expression pattern and the role of Ftz-f1 in *Drosophila* PGs from third instar larvae were not completely understood. Our results show that disruption of Ftz-f1 in the PG by RNAi impairs development at late L3, which clearly proves that Ftz-f1 is required at the larval-pupal transition. Interestingly, Ftz-f1 knockdown in the PG results not only in reduction of Dlb expression as expected, but also in diminution of Smp1 expression and a significant decrease of lipid levels. Therefore, our study implicates Ftz-f1 in sterol homeostasis in the PG as well as in the ovary, suggesting that this role could be extended to more steroidogenic tissues. Interestingly, Nhr-25, the only *C. elegans* member of the NR5A family, controls the larval to adult transition by regulating an endocrine program of lipid uptake and synthesis [72,73].

A growing number of nuclear receptors are also known to be targets of SUMOylation (reviewed in [74,75]). In mammals, the nuclear receptor coregulator KLF5 (Krüppel-like transcription factor 5) uses SUMOylation as a molecular switch to repress or activate genes involved in lipid catabolism [76]. Other transcription factors modified by SUMO and involved in energy metabolism include PPAR- $\gamma$ , C/EBPs and SREBPs [77–79]. In addition, a deSUMOylating enzyme, SeNP2 plays a critical role in the control of adipogenesis [80]. SUMOylation of SF-1, as suggested for other transcription factors, attenuates its transcriptional activity [18]. However, only a subset of SUMO sensitive targets seems to be affected [81]. On the other hand, Androgen receptor interacting protein 4, which interacts with SUMOylated SF-1, suppresses SF-1 mediated transcription [82]. Recently, the elimination of SF-1 SUMOylation in mice has been described [21]. UnSUMOylable SF-1 mutants activated Sonic hedgehog signaling and altered other potential SUMO sensitive targets, leading to endocrine abnormalities and changes in cell fate. SUMO modification has also been associated with increased transcriptional activity of nuclear receptors, as reported for retinoid acid receptor related orphan receptor  $\alpha$  (ROR  $\alpha$ ) and estrogen receptor  $\alpha$  (ER $\alpha$ ). Interestingly, SUMOylation at the hinge region of both nuclear receptors has been associated to transcriptional activation [83,84]. SUMOylation of Ftz-f1, as occurs with its orthologue SF-1, could be an important mechanism to control its activity and probably a correct ratio of SUMOylated to unmodified Ftz-f1 must be maintained for proper development. As for SF-1, SUMOylation of Ftz-f1 seems to reduce its capacity of transcriptional activation on Smp1. What could be the biological function of Ftz-f1 SUMOylation? One possibility might be that SUMOylation attenuates Ftz-f1 function after pupariation. As the first peak of ecdysone production subsides, perhaps Ftz-f1 SUMOylation and reduced levels of SR-BI contribute to this downregulation, separating it from the second ecdysone peak that drives pupation itself (10–12 hours after puparium formation).

### *Drosophila* SR-BIs requirement for cholesterol uptake and mobilization in the steroidogenic tissues PG and ovary

Cholesterol, a main component of the cell membranes, is also important for the synthesis of steroid hormones. Steroid hormone biosynthesis requires, in addition to correct cholesterol uptake, appropriate intercellular and intracellular transport. Insects, which

are incapable of synthesizing cholesterol, incorporate it from the diet through intestinal absorption and then transport it to different tissues via open circulation in the hemolymph associated with the lipoprotein lipophorin [85]. Several ultrastructural changes have been described in active PG cells, such as increased agranular ER, mitochondria and increased intracellular channels and nuclear folding that correlate with the sterol uptake and/or release of ecdysone [7,86–88]. However, the mechanisms used to incorporate cholesterol in the PG and secrete ecdysone are still largely unknown.

Two main pathways have been described for cellular uptake of lipoprotein-cholesteryl esters: the low-density lipoprotein (LDL) receptor mediated endocytic uptake of LDL-cholesterol and the “selective” cholesteryl ester uptake pathway mediated by SR-BI. In insects, proteins related to the mammalian LDLR, lipophorin receptors, have been identified [89]. Recently, the function of *Drosophila* Lpr1 and Lpr2 for neutral lipid uptake in imaginal disc cells and oocytes have been described; however, the phenotype of *lpr1* and *lpr2* mutants does not suggest a role for these receptors in the PG or in the larval-pupal transition [89].

In mammalian steroidogenic tissues the SR-BI “selective pathway”, without endocytic uptake, seems to be the main one used to satisfy the cholesterol requirements for hormone synthesis. [90–92]. Interestingly, SR-BI is also necessary for the formation of the microvillar channels of the adrenal gland, as shown by the reduction of channels in SR-BI null mice and the increased formation of these channels after overexpression of SR-BI [24,93–96]. SR-BI is also expressed in the rat ovary where, similar to adrenocortical cells [95], it is detected on microvilli and membranes of microvillar channels that contained trapped lipoproteins [97]. The expression of SR-BI is regulated by the nuclear receptors SF-1 and LRH-1, supporting the significance of these receptors in lipid capture for steroidogenesis [22,23,98]. Other factors such as the hormones ACTH, estrogen or gonadotropin induce SR-BI expression [99,100].

The *Drosophila* CD36 gene family consists of 14 genes [30,101]. Recently, the expression of Smp1, Crq and Peste in steroidogenic tissues such as PG, ovaries and testes was described [31], pointing to a role for these receptors in these tissues. Significantly, the expression of these receptors in the PG was upregulated at the moment of pupariation when high levels of ecdysteroids are required [31] and this work). Silencing *Smp1* or *pes* in the PG produced the developmental arrest at L3 prior to pupariation. These results indicate that these receptors are not functionally equivalent and the presence of one of them cannot substitute for the other in the PG. Alternatively, reduction of the levels of one of the receptors might be enough to lower the total content of Scavengers and, therefore, the total capacity of the cell for capturing lipids. Interestingly, overexpression of *Smp1* is able to rescue the lipid content of *smt3i* PG cells. However, this rescue of lipid content is not sufficient to allow the larval-pupal transition, suggesting that the cells are still unable to produce a threshold level of ecdysone. There could be several explanations for this. For instance, overexpression of one of the receptors would be enough for lipid capture but not for lipid mobilization. In this respect, abnormally large lipids droplets were observed in *Smp1i* PG cells, which suggest an additional role in sterol mobilization or a function in the regulation of the lipid droplet size. Several proteins have been shown to affect the size of the lipid droplets such as Rab small GTPases, sterol regulatory element binding protein cleavage activating protein (SCAP) and isoforms of phosphocholine cytidyltransferase [102,103]. Mutants for other proteins that promote intracellular transport of lipids in the PG, such *npc1a* mutants, have abnormal accumulation of intracellular sterol and are unable to molt due to low levels of ecdysone [104–106].

We showed that the expression of SR-BIs increases at the onset of pupariation, coinciding with an increase in PG's lipid content. Moreover, our results showed that SR-BIs are regulated by Ftz-f1. Interestingly, the *Snmp1* locus contains two putative Ftz-f1 binding sites and an atypical SF-1 binding site that could be implicated in *Snmp1* regulation. Indeed, experiments in cultured cells and *in vivo* showed that Ftz-f1 is able to activate *Snmp1* promoter. *Snmp1* might not be the only Scavenger Receptor regulated by Ftz-f1 in the PG. Furthermore, in addition to SUMOylation influencing the capacity of Ftz-f1 to regulate SR-BIs expression (Figure 8H), we observed that *Snmp1* contains two high score putative SUMOylation sites (data not shown). Is *Snmp1* modified by SUMO and could this modification affect its function in cholesterol uptake/transport during the larval to pupa transition? Does SUMOylated Ftz-f1 affect the regulation of other SR-BIs in clear-gut larvae? We cannot discard the possibility that other proteins involved in ecdysone synthesis or transport are SUMOylated. The fact that viability is not rescued by *Snmp1* overexpression, suggests that this is indeed the case. These questions remain unanswered and will be addressed in the future.

In summary, we demonstrated that *Drosophila* SR-BI family and Ftz-f1 participate in steroidogenesis downstream of SUMOylation by regulating the lipid uptake in the PG required for the synthesis of ecdysone. The participation of these factors in lipid uptake is conserved in other steroidogenic tissues, suggesting a general role for SUMO, Ftz-f1 and SR-BI in lipid uptake. Our data provide new insight into the lipid homeostasis of the organism.

## Materials and Methods

### Drosophila strains

Flies were raised on standard *Drosophila* medium at 25°C. The wild-type (WT) control strain was Vallecas. Gal4 strains were *phm-Gal4*, *UAS-mCD8::GFP/TM6B*, *Tb* (called *phm-Gal4*, obtained from P. Leopold and C. Mirth) [107,108] and *P(GawB)T155-Gal4* (Bloomington *Drosophila* Stock Center- BDSC). UAS-RNAi lines were: *UAS-smt3i* [7]; *UAS-ftz-f1i* (Vienna *Drosophila* RNAi Center-VDRC- #2959, which recognizes  $\alpha$  and  $\beta$ *ftz-f1* isoforms); *UAS-psi* (VDRC #33155); *UAS-crq1* (VDRC #45883); *UAS-Snmp1i* (VDRC #04210) and *UAS-Snmp1i* (NIG-FLY #7000R-3). Overexpression UAS lines used were obtained from BDSC: *y<sup>1</sup>w<sup>67e23</sup>;P(EPgy2)crq<sup>EY14489</sup>* (#20939); *w;P(UAS-Snmp1.B)217.1/CyO;TM2/TM6B,Tb<sup>1</sup>* (#25044); *w<sup>\*</sup>;P(UAS-Snmp1.YFP(2)273.4/CyO;TM2/TM6B,Tb<sup>1</sup>* (#25046) and *w<sup>\*</sup>;P(UAS-Snmp1-EGFP)218.3/CyO;TM2/TM6B,Tb<sup>1</sup>* (#25045). Information about other strains can be found in FlyBase (<http://flybase.bio.indiana.edu>).

### Plasmid construction and generation of transgenic strains

Full length  $\alpha$  and  $\beta$ *ftz-f1* cDNA sequences (EMBL database accession numbers HE716957 and HE716956, respectively; GeneArt) were cloned into the *EcoRI-XbaI* sites of *pUASTattb* vector [109] to generate *pUASTattb- $\alpha$ ftz-f1* and *pUASTattb- $\beta$ ftz-f1*, respectively. 3×Flag sequences were inserted into the *EcoRI-BglII* sites. To generate constitutively SUMOylated forms, degenerated nucleotide *smt3* sequence that encodes for WT Smt3 protein (EMBL database accession number FN539078) [110] was introduced into the *AscI* and *PacI* sites of the previous vectors to generate *pUASTattb-Smt3- $\alpha$ ftz-f1* and *pUASTattb-Smt3- $\beta$ ftz-f1*, respectively.

Renilla and firefly luciferase (Fluc) were amplified from psiCHECK2 (Promega) by PCR and exchanged for GFP in *Ac5-STABLE1* (*EcoRI-HindIII*) [111] to generate *Ac5-FFluc-STABLE1*. For the construction of *pSnmp1-Fluc* genomic DNA was used as template to amplify a PCR fragment containing 2 Kb of the *Snmp1*

upstream region (including 77 bp of 5'UTR) using the oligonucleotides *Snmp1*(-2000) (5'- GATCAGATCTTGAGCACTTAGGCATTTTTCAAACACTATTTGGG -3') and *Snmp1*(+1) (5'- GATCGAATTCCTCTGGGCAATGTTTCGATCTCTACTC-3') (numbering based on initiator methionine). The resulting *BglII-EcoRI* fragment was used to replace the Actin5C promoter in *Ac5-FFluc-STABLE1*. Two potential Ftz-f1 binding sites were identified based on published consensus sites. Fragments were prepared for individual and double mutants in these potential Ftz-f1 binding sites using 2-step overlap extension PCR, using the forward and reverse primers *Ftz-f1Mut*(-1971) (5'- CTTAGGCATTTTTCAAAC-TATTTGttCCAGCAATAATTGGTAGCAAAC -3') and *Ftz-f1Mut*(-1410) (5'-GAGCCCAGTTAGCCGGTCAAttTGGCAGAGCATCTAACTTAAATGG -3') (mutated nucleotides in lowercase and bold). Resulting fragments were used to replace *Snmp1* WT promoter sequence to generate *pSnmp1Mut-FLuc* plasmids. All constructs were fully sequenced.

To generate *pUASTattb-crq* and *pUASTattb-pes*, ESTs RE02070 and RE21078 inserted in the PFLC1 plasmid (*Drosophila* Genomics Resource Center- DGRC), were digested with *EcoRI* and *BamHI*, or *MfeI* and *BglII*, respectively. Fragments were inserted in *pUASTattb* [109] digested with *EcoRI* and *BglII*. Transgenic lines were generated following standard transformation procedures [112].

### In vivo and in vitro SUMOylation assays

SUMOylation motifs were identified using SUMOplot (<http://www.abgent.com/sumoplot>) software and Phosida Posttranslational Modification Database (<http://www.phosida.com>). For the *in vitro* procedure *ftz-f1 cDNA* (LD34889, DGRC) was translated using TNT-T7 (wheat germ extract; Promega), to which 35S-methionine was added (Amersham Biosciences and Pierce). This cDNA construct contains three out of the four conserved SUMOylation consensus sites. Translated Ftz-f1 was incubated with an ATP-regenerating system, SUMO-1, Ubc9 and E1 activating enzyme (Biomol). Reactions were incubated at 30°C for 2 h, resolved by SDS-PAGE and exposed.

For cellular SUMOylation assays we developed new technology based on Franco et al. [113]. In brief, a plasmid encoding a form of Smt3, capable of being biotinylated, as well as the enzyme necessary for biotinylation, BirA, were introduced into cells. Any proteins that undergo SUMOylation will also be biotinylated facilitating their recovery using streptavidin beads. BirA was amplified from the *UAS-(bioUb)6-birA* vector [113] and cloned in *pAc5-STABLE2-Neo* [111] by substituting GFP, generating *pAc5-FLAGmCherry-BirA*. To generate *pAc5-bioSUMO-BirA*, degenerated *Drosophila smt3* sequence (EMBL database accession number FN539078) [110] was fused to a biotin tag according to the strategy described [113]. The fusion was cloned into the *pAc5-FLAGmCherry-BirA* vector by substituting *FLAGmCherry*.

*Drosophila* S2R+ cells were obtained from DGRC [114]. Cells were cultured at 25°C in *Drosophila* Schneider's medium (Invitrogen) supplemented with 10% fetal bovine serum (Gibco) and 1% penicillin/streptomycin (Gibco). Transfections were performed using Effectene (Qiagen) in 6-well plates with 1  $\mu$ g of *pAc5-Gal4* (Addgene #24344) [115], 1  $\mu$ g of *pUASTattb-Flag- $\beta$ ftz-f1* and 1  $\mu$ g of *pAc5-bioSUMO-BirA* or *pAc5-BirA*.

Transfected cells were collected after 3 days, washed with phosphate buffered saline (PBS) 1X and lysed in 200  $\mu$ l of lysis buffer [8 M urea, 1% SDS, 50 mM N-ethylmaleimide in PBS and protease inhibitor mixture (Roche)]. Pulldowns were done according to [113] using 50  $\mu$ l suspension of NeutrAvidin-agarose beads (ThermoScientific). For elution, samples were heated 5 minutes at 95°C in 4× Laemmli sample buffer with 100 mM

DTT. The eluted sample was separated from the beads using a Vivaclear Mini 0.8 µm PES microcentrifuge filter unit. The recovered volume for both control and experimental samples was 30 µl.

For Western blots we used mouse monoclonal anti-Flag M2 antibody (1:2000; Sigma), HRP-conjugated secondary antibody (1:5000; Jackson ImmunoResearch) and HRP-linked anti-Biotin antibody (1:200; Cell Signaling Technology).

### RNA probe preparation and *in situ* hybridization

ESTs from the DGRC cDNA collections were used as templates for the synthesis of the RNA probes (IP13851 for *Snmp1*, RE21078 for *pes*, RE02070 for *crq* and LD34889 for *ftz-f1*). RNA labeling was performed using the DIG RNA labeling Mix (Roche) according to the manufacture instructions, using 1 µg of linearized DNA.

RNA probes were hybridized to larval tissues at 55°C in 50% deionized formamide (Sigma), 5× saline sodium citrate, 50 µg/ml heparin sodium salt (Sigma), 0.1% Tween 20, and 100 µg/ml of phenol extracted sonicated salmon sperm DNA (Amersham Biosciences). Samples were incubated with anti-digoxigenin antibody (1:2000; AP Fab fragments, Roche) and signal was detected using 4-Nitro blue tetrazolium chloride and 5-Bromo-4-chloro-3-indolyl-phosphate (Roche).

### qPCR analysis

RNA was extracted from isolated ring glands complexed with brain hemispheres placed in RNAlater (Ambion) and frozen in liquid nitrogen. At least two different pools of 50 to 100 specimens were collected per genotype. Total RNA extracts were obtained using the “mirVana miRNA isolation kit” (Ambion) according to the manufacturer’s instructions and were quantified using Nanodrop (Thermo Scientific). cDNAs were prepared from 0.2 µg of RNA using the SuperScript III First-Strand Synthesis System for RT-PCR (Invitrogen) at a 10 µl volume per reaction, following manufacturer’s instructions.

Oligonucleotides for *pes*, *crq*, *Snmp1* and *RpL32* were designed using NCBI primer blast (<http://www.ncbi.nlm.nih.gov/tools/primer-blast>). *RpL32* was used as control. Oligo sequences were:

*Pes*(+)384Fwd, 5'-TCGCCGCTGCCTTTAGACTTCGATA-3';  
*Pes*(-)660Rev, 5'-CACGTCTAGCAGCAGAGTGCGC-TAC-3';

*Crq*(+)1747Fwd, 5'-GAGCCCCGATGACGACTTCGACATA-T-3';

*Crq*(-)1967Rev, 5'-ACCCACTTTTTTCGTACAGTCAGC-G-3';

*Snmp1*(+)741Fwd, 5'-ATGGGTCAGGCCAATCACTCGG-ATT-3';

*Snmp1*(-)935Fwd, 5'-CAGGCCATCCTCCTTTTTTCAAG-CCC-3';

*RpL32*(+)365For, 5'-CCTTCCAGCTTCAAGATGACCAT-CC-3';

*RpL32*(-)598Rev, 5'-ATCCGTAACCGATGTTGGGCAT-CAG-3'.

qPCR was done using FastStart Universal SYBR green Master (Roche). Reactions were performed in 10 µl, adding 2 µl of cDNA, 2× SYBR green and 0.2 µl of each primer (10 µM), in a CFX96-thermocycler (BioRad) with the following protocol: 95°C for 10 min, 40 cycles of 95°C for 10 seconds and 58.5°C for 1:30 min, and a final extension of 95°C for 1 min. Per each pair of primers a melt curve from 65 to 95°C, with 0.5°C temperature increment every 5 seconds was done. Reactions were done in triplicates and checked by electrophoresis for validation of amplification specificity. *RpL32* was used as control.

### Luciferase assay

*Drosophila* S2R+ cells were seeded in 24-well plates and transfected with 150 ng of *pSnmp1-FLuc* or *pSnmp1Mut-FLuc*, either alone or co-transfected with the same quantities of *pUASTattb- $\alpha$ ftz-f1*, *pUASTattb- $\beta$ ftz-f1*, *pUASTattb-Smt3- $\alpha$ ftz-f1* or *pUASTattb-Smt3- $\beta$ ftz-f1*. 150 ng of *pAc-Gal4* [116] and 50 ng of *pAc-Renilla* were added to all the wells. Transcriptional activity was measured 48 hours after transfection using the Dual-Luciferase Reporter Assay System (Promega), following the manufacturer’s instructions. Luminescence was measured in a microplate luminometer (Veritas). Results are given as means+S.D. Differences between groups were calculated using Student’s t test in Microsoft Excel.

### Immunocytochemistry

Adults were allowed to lay eggs during 8 hours and wandering larvae were collected 5 days AEL. Larvae and ovaries from adult flies were dissected in PBS, fixed in 4% paraformaldehyde for 20 minutes and washed three times in PBT (PBS, 0.3% triton X-100) for 20 minutes. Samples were blocked in PBT +1% BSA for one hour and incubated with the appropriate antibodies at 4°C overnight. Next day, tissues were washed with PBT three times, for 20 minutes each and incubated with secondary antibodies at room temperature for two hours. The following primary antibodies were used: guinea pig polyclonal anti-Cad99C (1:3,000) [47]; mouse monoclonal DE-Cad (1:25; DCAD2, Developmental Studies Hybridoma Bank); rabbit polyclonal anti-Smt3 (1:500) [117]; goat polyclonal anti-Ftz-f1 (1:25; Santa Cruz, Sc-27221); rabbit polyclonal anti-Crq (1:100) [118]; rabbit polyclonal anti-Snmp1 (1:1000) [119] and rabbit polyclonal anti-Dib (1:200) [26]. Fluorescence Alexa 568 secondary antibody (Molecular Probes) was used at 1:200 dilution. DAPI (Roche) was used at 1:2000 dilution. Phalloidin-TRITC (Sigma) was used 1:1000. Samples were mounted in Vectashield (Roche) mounting medium. Confocal images were taken with a Leica DM IRE2 confocal microscope.

### Oil Red O stainings

Ring glands were fixed in 4% paraformaldehyde for 20 minutes, washed twice in PBS and stained with Oil Red O (Sigma) solution at 0.06% in isopropanol for 30 minutes. Samples were washed twice in PBS before mounting in Vectashield. Images were taken with a Leica DM IRE2 confocal microscope.

Quantification of lipid droplets was done on single plane confocal micrographs of Oil Red O stainings using the Analyze Particle tool from ImageJ software. At least 10 independent micrographs were analyzed per genotype. Measurements were analyzed and plotted using Microsoft Excel.

### 20E feeding experiments

*phm-Gal4>UAS-ftz-f1i* and *phm-Gal4>UAS-Snmp1i* larvae were collected at 120 hours AEL and placed in groups of 10 individuals in new tubes. These were supplemented with 20E (Sigma) dissolved in ethanol and mixed with yeast at 1 mg/ml. Control larvae were fed with yeast supplemented with ethanol alone.

### Supporting Information

**Figure S1** Conservation of SUMOylation consensus sites in Ftz-f1 related sequences from vertebrates to insects. ClustalW analysis of the Ftz-f1 homologues in the indicated species. SUMOylation consensus sites conserved only among insects are marked in pink, those conserved between insects and NR5A2 homologues are highlighted in orange and those conserved among the vertebrate NR5A2 and NR5A1 (SF-1) are indicated in blue. Orange and

purple asterisks mark the sites SUMOylated in rat LRH-1/NR5A2 [14]. Blue and purple asterisks indicate the sites SUMOylated in mouse SF-1 [21]. The blue bar above the alignments indicates the DNA binding domain, while the red bars indicate the ligand binding domains. Below the alignments, asterisks indicate identical amino acids, colons indicate conserved substitutions and periods indicate semiconserved substitutions. Accession numbers of the sequences used for the analysis: *Aedes aegypti*, XP\_001654601.1; *Anopheles gambiae*, XP\_315680.4; *Apis mellifera*, XP\_001122182.2; *Blattella germanica*, CAQ57670.1; *Bombyx mori*, BAK53999.1; *Drosophila melanogaster*, NP\_524143.2; *Gallus gallus* NR5A2, NP\_990409.1 and SF1, BAA76713.1; *Homo sapiens* NR5A2, NP\_003813.1 and SF-1, NP\_004950.2; *Manduca sexta*, AAL50351.1; *Monodelphis domestica* NR5A2, XP\_001377433.2 and SF-1, XP\_001371703.2; *Mus musculus* NR5A2, NP\_109601 and SF-1, NP\_620639.1; *Rattus norvegicus* NR5A2, NP\_068510 and SF-1, NP\_001178028.1; *Tribolium castaneum*, XP\_970369.2; *Xenopus laevis* NR5A2, NP\_001081185.1 and SF-1, NP\_001091438.1. (TIF)

**Figure S2** Expression of Scavenger Receptors in PGs of WT or *smt3i* backgrounds. (A–H) Micrographs of *crq* (A–D) or *pes* (E–H) mRNA *in situ* hybridization in PGs from WT (A, B, E, F) or *phm-Gal4>UAS-smt3 RNAi (smt3i)* larvae (C, D, G, H) at the indicated hours AEL. *crq* mRNA is upregulated in WT clear-gut larvae (B, compare with A). However, no expression is visible in *smt3i* PGs (C, D). *pes* mRNA is also moderately upregulated in WT clear-gut larvae (B, compare with A) but, in contrast to *crq* and *Smp1*, is still expressed in *smt3i* larvae (G, H). All the *in situ* reactions were stopped at the same time and pictures were taken at the same magnification. (TIF)

## References

- Warren JT, Yerushalmi Y, Shimell MJ, O'Connor MB, Restifo LL, et al. (2006) Discrete pulses of molting hormone, 20-hydroxyecdysone, during late larval development of *Drosophila melanogaster*: correlations with changes in gene activity. *Dev Dyn* 235: 315–326.
- Gilbert LI (2004) Halloween genes encode P450 enzymes that mediate steroid hormone biosynthesis in *Drosophila melanogaster*. *Mol Cell Endocrinol* 215: 1–10.
- Rewitz KF, Rybczynski R, Warren JT, LI G (2006) The Halloween genes code for cytochrome P450 enzymes mediating synthesis of the insect molting hormone. *Biochem Soc Trans* 34: 1256–1260.
- Thummel CS (2001) Molecular mechanisms of developmental timing in *C. elegans* and *Drosophila*. *Dev Cell* 1: 453–465.
- Ruaud (2010) The *Drosophila* nuclear receptors DHR3 and betaFTZ-F1 control overlapping developmental responses in late embryos. *Development* 137: 123–131.
- Hay RT (2005) SUMO: a history of modification. *Mol Cell* 18:1–12.
- Talamillo A, Sánchez J, Cantera R, Pérez C, Martín D, et al. (2008) Smt3 is required for *Drosophila melanogaster* metamorphosis. *Development* 135: 1659–1668.
- Sieber MH TC (2009) The DHR96 nuclear receptor controls triacylglycerol homeostasis in *Drosophila*. *Cell Metab* 10: 481–490.
- Bujold M, Gopalakrishnan A, Nally E, King-Jones K (2010) Nuclear receptor DHR96 acts as a sentinel for low cholesterol concentrations in *Drosophila melanogaster*. *Mol Cell Biol* 30: 793–805.
- Horner MA, Pardee K, Liu S, King-Jones K, Lajoie G, et al. (2009) The *Drosophila* DHR96 nuclear receptor binds cholesterol and regulates cholesterol homeostasis. *Genes Dev* 23: 2711–2716.
- Palanker L, Tennessen JM, Lam G, Thummel CS (2009) *Drosophila* HNF4 regulates lipid mobilization and beta-oxidation. *Cell Metab* 9: 228–239.
- Mataki C, Magnier BC, Houten SM, Annicotte JS, Argmann C, et al. (2007) Compromised intestinal lipid absorption in mice with a liver-specific deficiency of liver receptor homolog 1. *Mol Cell Biol* 27: 8330–8339.
- Urs AN, Dammer E, Kelly S, Wang E, Merrill AHJ, et al. (2007) Steroidogenic factor-1 is a sphingolipid binding protein. *Mol Cell Endocrinol* 265–266: 174–178.
- Yang FM, Pan CT, Tsai HM, Chiu TW, Wu ML, et al. (2009) Liver receptor homolog-1 localization in the nuclear body is regulated by sumoylation and cAMP signaling in rat granulosa cells. *FEBS J* 276: 425–36.
- Li Y, Choi M, Cavey G, Daugherty J, Suino K, et al. (2005) Crystallographic identification and functional characterization of phospholipids as ligands for the orphan nuclear receptor steroidogenic factor-1. *Mol Cell* 17: 491–502.
- Krylova (2005) Structural analyses reveal phosphatidyl inositols as ligands for the NR5 orphan receptors SF-1 and LRH-1. *Cell* 120: 343–355.
- Wang W, Zhang CD, Marimuthu A, Krupka HI, Tabrizi M, et al. (2005) The crystal structures of human steroidogenic factor-1 and liver receptor homologue-1. *Proc Natl Acad Sci U S A* 102: 7505–7510.
- Lee MB, Lebedeva LA, Suzawa M, Wadekar SA, Desclozeaux M, et al. (2005) The DEAD-box protein DP103 (Ddx20 or Gemin-3) represses orphan nuclear receptor activity via SUMO modification. *Mol Cell Biol* 25: 1879–1890.
- Chen WY, Lee WC, Hsu NC, Huang F, Chung BC (2004) SUMO modification of repression domains modulates function of nuclear receptor 5A1 (steroidogenic factor-1). *J Biol Chem* 279: 38730–38735.
- Komatsu T, Mizusaki H, Mukai T, Ogawa H, Baba D, et al. (2004) Small ubiquitin-like modifier 1 (SUMO-1) modification of the synergy control motif of Ad4 binding protein/steroidogenic factor 1 (Ad4BP/SF-1) regulates synergistic transcription between Ad4BP/SF-1 and Voxel 9. *Mol Endocrinol* 18: 2451–2462.
- Lee FY, Faivre EJ, Suzawa M, Lontok E, Ebert D, et al. (2011) Eliminating SF-1 (NR5A1) Sumoylation *In vivo* Results in Ectopic Hedgehog Signaling and Disruption of Endocrine Development. *Dev Cell* 21: 315–327.
- Cao G, Garcia C, Wyne K, Schultz R, Parker K, et al. (1997) Structure and localization of the human gene encoding SR-BI/CLA-1. Evidence for transcriptional control by steroidogenic factor 1. *J Biol Chem* 272: 33068–33076.
- Cao G, Zhao L, Stangl H, Hasegawa T, Richardson J, et al. (1999) Developmental and hormonal regulation of murine scavenger receptor, class B, type 1. *Mol Endocrinol* 13: 1460–1473.
- Williams DL, Wong JS, Hamilton RL (2002) SR-BI is required for microvillar channel formation and the localization of HDL particles to the surface of adrenocortical cells *in vivo*. *J Lipid Res* 43: 544–549.
- Liu Z, Simpson ER (1997) Steroidogenic factor 1 (SF-1) and SP1 are required for regulation of bovine CYP11A gene expression in bovine luteal cells and adrenal Y1 cells. *Mol Endocrinol* 11: 127–137.
- Parvy JP, Blais C, Bernard F, Warren JT, Petryk A, et al. (2005) A role for betaFTZ-F1 in regulating ecdysteroid titers during post-embryonic development in *Drosophila melanogaster*. *Dev Biol* 282: 84–94.

**Figure S3** Distribution of lipid droplets when *smt3* or *Smp1* are silenced. (A–B) Single plane confocal micrographs taken under the same intensity settings showing the lipid droplets marked by Oil Red O staining (green). Nuclei are labelled with DAPI (purple). F-actin cytoskeleton is shown in blue. Follicle cells are indicated by yellow dotted lines. (A'–B') Single gene channels are shown in black and white. (A) In *T155-Gal4>UAS-smt3i* follicle cells show reduced lipid droplets. However, the oocyte (its nucleus in purple indicated by a yellow arrowhead) gets lipids through the ring canals (white arrowhead) from the nurse cells. Lipids are indicated by yellow arrowheads in A'. (B) In *T155-Gal4>UAS-Smp1i*, the lipid intake by follicle cells is reduced. Droplets only occupy the basal side of the cells (b; indicated by a yellow arrowhead), while the apical side remains depleted (a). (TIF)

## Acknowledgments

We thank E. Caminero (*Drosophila* Transformation Platform, Genshape Consolider Program) for the generation of the transgenic lines. We are grateful to A. J. Courey, D. Godt, J.-P. Parvy, C. Dauphin-Villemant, P. Leopold, C. Mirth, N. Franc, L. Luo, L. B. Vosshall, Bloomington *Drosophila* Stock Center, Vienna *Drosophila* RNAi Center, NIG-FLY, *Drosophila* Genome Resource Center, and Addgene for reagents. We thank M. Franco and J. Ramirez for help with the pull-down experiments. We are grateful to J. Culi and D. Martín for the critical reading of the manuscript.

## Author Contributions

Conceived and designed the experiments: AT JDS RB. Performed the experiments: AT LH LP CP MG JS FL-O JDS RB. Analyzed the data: AT LH JDS RB. Contributed reagents/materials/analysis tools: UM MSR. Wrote the paper: AT RB.

27. Lavorgna G, Karim FD, Thummel CS, Wu C (1993) Potential role for a FTZ-F1 steroid receptor superfamily member in the control of *Drosophila* metamorphosis. *Proc Natl Acad Sci U S A* 90: 3004–3008.
28. Yamada (2000) Temporally restricted expression of transcription factor betaFTZ-F1: significance for embryogenesis, molting and metamorphosis in *Drosophila melanogaster*. *Development* 127: 5083–5092.
29. Rhainds D, Brissette L (2004) The role of scavenger receptor class B type I (SR-BI) in lipid trafficking: defining the rules for lipid traders. *Int J Biochem Cell Biol* 36: 39–77.
30. Nichols Z, Vogt RG (2008) The SNMP/CD36 gene family in Diptera, Hymenoptera and Coleoptera: *Drosophila melanogaster*, *D. pseudoobscura*, *Anopheles gambiae*, *Aedes aegypti*, *Apis mellifera*, and *Tribolium castaneum*. *Insect Biochem Mol Biol* 38: 398–415.
31. Herboso L, Talamillo A, Pérez C, Barrio R (2011) Expression of the Scavenger Receptor Class B type I (SR-BI) family in *Drosophila melanogaster*. *Int J Dev Biol* 55: 603–611.
32. Romana I, Pascual N, Bellés X (1995) The ovary is a source of circulating ecdysteroids in *Blattella germanica* (Dyctyoptera: Blattellidae). *European Journal of Entomology* 92: 93–103.
33. Lagueux M, Hirm M, Hoffmann JA (1977) Ecdysone during ovarian development in *Locusta migratoria*. *J Insect Physiol* 23: 109–119.
34. Hetru CC, Kappler C, Hoffmann JA, Nearn R, Bang L, et al. (1982) The biosynthetic pathway of ecdysone: studies with vitellogenic ovaries of *Locusta migratoria* (Orthoptera). *Mol Cell Endocrinol* 26: 51–80.
35. Handler (1982) Ecdysteroid titers during pupal and adult development in *Drosophila melanogaster*. *Dev Biol* 93: 73–82.
36. Rubenstein EC, Kelly TJ, Schwartz MB, Woods CW (1982) *In vitro* synthesis and secretion of ecdysteroids by *Drosophila melanogaster* ovaries. *Journal of Experimental Zoology* 223: 305–308.
37. Hashiyama (2009) Expression of genes involved in sumoylation in the *Drosophila* germline. *Gene Expr Patterns* 9: 50–53.
38. Hrdlicka L, Gibson M, Kiger A, Micchelli C, Schober M, et al. (2002) Analysis of twenty-four Gal4 lines in *Drosophila melanogaster*. *Genesis* 34: 51–57.
39. Chávez V, Marqués G, Delbecque J, Kobayashi K, Hollingsworth M, et al. (2000) The *Drosophila* disembodied gene controls late embryonic morphogenesis and codes for a cytochrome P450 enzyme that regulates embryonic ecdysone levels. *Development* 127: 4115–4126.
40. Warren JT, Petryk A, Marqués G, Parvy JP, Shinoda T, et al. (2004) Phantom encodes the 25-hydroxylase of *Drosophila melanogaster* and *Bombyx mori*: a P450 enzyme critical in ecdysone biosynthesis. *Insect Biochem Mol Biol* 34: 991–1010.
41. Petryk A, Warren JT, Marqués G, Jarcho MP, Gilbert LI, et al. (2003) Shade is the *Drosophila* P450 enzyme that mediates the hydroxylation of ecdysone to the steroid insect molting hormone 20-hydroxyecdysone. *Proc Natl Acad Sci U S A* 100: 13773–13778.
42. Freeman MR, Dobritsa A, Gaines P, Segraves WA, Carlson JR (1999) The *dave* gene: steroid hormone production, olfactory behavior, and neural degeneration in *Drosophila*. *Development* 126: 4591–4602.
43. Yoshiyama T, Namiki T, Mita K, Kataoka H, Niwa R (2006) Neverland is an evolutionally conserved Rieske-domain protein that is essential for ecdysone synthesis and insect growth. *Development* 133: 2565–2574.
44. Schwartz MB, Kelly TJ, Woods CW, Imberski RB (1989) Ecdysteroid fluctuations in adult *Drosophila melanogaster* caused by elimination of pupal reserves and synthesis by early vitellogenic ovarian follicles. *Insect Biochem* 19: 243–249.
45. Schwartz MB, Kelly TJ, Imberski RB, Rubenstein EC (1985) The effects of nutrition and methoprene treatment on ovarian ecdysteroid synthesis in *Drosophila melanogaster*. *J Insect Physiol* 31: 947–957.
46. Mahowald (1972) Ultrastructural observations on oogenesis in *Drosophila*. *J Morphol* 137: 29–48.
47. D'Alterio C, Tran DD, Yeung MW, Hwang MS, Li MA, et al. (2005) *Drosophila melanogaster* Cad99C, the orthologue of human Usher cadherin PCDH15, regulates the length of microvilli. *J Cell Biol* 171: 549–558.
48. Schlichting (2006) Cadherin Cad99C is required for normal microvilli morphology in *Drosophila* follicle cells. *J Cell Sci* 119: 1184–1195.
49. Niewiadomska P, Godt D, Tepass U (1999) DE-Cadherin is required for intercellular motility during *Drosophila* oogenesis. *J Cell Biol* 144: 533–547.
50. Ito M, Park Y, Weck J, Mayo KE, Jameson JL (2000) Synergistic activation of the inhibin alpha-promoter by steroidogenic factor-1 and cyclic adenosine 3',5'-monophosphate. *Mol Endocrinol* 14: 66–81.
51. Ross S, Best JL, Zon LI, Gill G (2002) SUMO-1 modification represses Sp3 transcriptional activation and modulates its subnuclear localization. *Mol Cell* 10: 831–842.
52. Jakobs A, Koehnke J, Himstedt F, Funk M, Korn B, et al. (2007) Ubc9 fusion-directed SUMOylation (UFDS): a method to analyze function of protein SUMOylation. *Nat Methods* 4: 245–250.
53. Ulrich HD (2009) The SUMO system: an overview. *Methods Mol Biol* 497: 3–16.
54. Epps JL, Tanda S (1998) The *Drosophila semushi* mutation blocks nuclear import of bicoid during embryogenesis. *Curr Biol* 8: 1277–1280.
55. Long X, Griffith LC (2000) Identification and characterization of a SUMO-1 conjugation system that modifies neuronal calcium/calmodulin-dependent protein kinase II in *Drosophila melanogaster*. *J Biol Chem* 275: 40765–40776.
56. Lehembre F, Badenhorst P, Müller S, Travers A, Schweisguth F, et al. (2000) Covalent modification of the transcriptional repressor tramtrack by the ubiquitin-related protein Smt3 in *Drosophila* flies. *Mol Cell Biol* 20: 1072–1082.
57. Shigenobu S, Kitadate Y, Noda C, Kobayashi S (2006) Molecular characterization of embryonic gonads by gene expression profiling in *Drosophila melanogaster*. *Proc Natl Acad Sci U S A* 103: 13728–13733.
58. Talamillo A, Sánchez J, Barrio R (2008) Functional analysis of the SUMOylation pathway in *Drosophila*. *Biochem Soc Trans* 36: 868–873.
59. Lomeli H, Vázquez M (2011) Emerging roles of the SUMO pathway in development. *Cell Mol Life Sci* 68: 4045–64.
60. Kageyama Y, Masuda S, Hirose S, Ueda H (1997) Temporal regulation of the mid-prepupal gene FTZ-F1: DHR3 early late gene product is one of the plural positive regulators. *Genes Cells* 2: 559–569.
61. Lam GT, Jiang C, Thummel CS (1997) Coordination of larval and prepupal gene expression by the DHR3 orphan receptor during *Drosophila* metamorphosis. *Development* 124: 1757–1756.
62. White KP, Hurban P, Watanabe T, Hogness DS (1997) Coordination of *Drosophila* metamorphosis by two ecdysone-induced nuclear receptors. *Science* 276: 114–117.
63. Cáceres L, Necakov AS, Schwartz C, Kimber S, Roberts IJ, et al. (2011) Nitric oxide coordinates metabolism, growth, and development via the nuclear receptor E75. *Genes Dev* 25: 1476–1485.
64. Akar CA, Feinstein DL (2009) Modulation of inducible nitric oxide synthase expression by sumoylation. *J Neuroinflammation* 6: 12.
65. Watanabe M, Itoh K (2011) Characterization of a novel posttranslational modification in neuronal nitric oxide synthase by small ubiquitin-related modifier-1. *Biochim Biophys Acta* 1814: 900–907.
66. Nie M, Xie Y, Loo J, Courey A (2009) Genetic and proteomic evidence for roles of *Drosophila* SUMO in cell cycle control, Ras signaling, and early pattern formation. *PLoS ONE* 4: e5905. doi:10.1371/journal.pone.0005905.
67. Huang H, Du G, Chen H, Liang X, Li C, et al. (2011) *Drosophila* Smt3 negatively regulates JNK signaling through sequestering Hipk in the nucleus. *Development* 138: 2477–2485.
68. Fortier TM, Vasa PP, Woodard CT (2003) Orphan nuclear receptor betaFTZ-F1 is required for muscle-driven morphogenetic events at the prepupal-pupal transition in *Drosophila melanogaster*. *Dev Biol* 257: 153–165.
69. Broadus J, McCabe JR, Endrizzi B, Thummel CS, Woodard CT (1999) The *Drosophila* beta FTZ-F1 orphan nuclear receptor provides competence for stage-specific responses to the steroid hormone ecdysone. *Mol Cell* 2: 143–149.
70. Cruz J, Nieva C, Mané-Padrós D, Martín D, Bellés X (2008) Nuclear receptor BgFTZ-F1 regulates molting and the timing of ecdysteroid production during nymphal development in the hemimetabolous insect *Blattella germanica*. *Dev Dyn* 237: 3179–3191.
71. Tan A, Palli SR (2008) Identification and characterization of nuclear receptors from the red flour beetle, *Tribolium castaneum*. *Insect Biochem Mol Biol* 38: 430–439.
72. Hada K, Asahina M, Hasegawa H, Kanaho Y, Slack FJ, et al. (2010) The nuclear receptor gene nhr-25 plays multiple roles in the *Caenorhabditis elegans* heterochronic gene network to control the larva-to-adult transition. *Dev Biol* 344: 1100–1109.
73. Mullancy BC, Blind RD, Lemieux GA, Perez CL, Elle IC, et al. (2010) Regulation of *C. elegans* fat uptake and storage by acyl-CoA synthase-3 is dependent on NR5A family nuclear hormone receptor nhr-2. *Cell Metab* 12: 398–410.
74. Talamillo A, Martin D, Hjerpe R, Sanchez J, Barrio R (2010) SUMO and ubiquitin modifications during steroid hormone synthesis and function. *Biochem Soc Trans* 38: 54–59.
75. Treuter E, Venticlef N (2011) Transcriptional control of metabolic and inflammatory pathways by nuclear receptor SUMOylation. *Biochim Biophys Acta* 1812: 909–918.
76. Oishi Y, Manabe I, Tobe K, Ohsugi M, Kubota T, et al. (2008) SUMOylation of Kruppel-like transcription factor 5 acts as a molecular switch in transcriptional programs of lipid metabolism involving PPAR-delta. *Nat Med* 14: 656–666.
77. Chung SS, Ahn BY, Kim M, Kho JH, Jung HS, et al. (2011) SUMO modification selectively regulates transcriptional activity of peroxisome-proliferator-activated receptor  $\gamma$  in C2C12 myotubes. *Biochem J* 433: 155–161.
78. Eaton EM, Sealy L (2003) Modification of CCAAT/enhancer-binding protein-beta by the small ubiquitin-like modifier (SUMO) family members, SUMO-2 and SUMO-3. *J Biol Chem* 278: 33416–33421.
79. Hirano Y, Murata S, Tanaka K, Shimizu M, Sato R (2003) Sterol regulatory element-binding proteins are negatively regulated through SUMO-1 modification independent of the ubiquitin/26 S proteasome pathway. *J Biol Chem* 278: 16809–16819.
80. Chung SS, Ahn BY, Kim M, Choi HH, Park HS, et al. (2010) Control of adipogenesis by the SUMO-specific protease SENP2. *Mol Cell Biol* 30: 2135–2146.
81. Campbell LA, Faivre EJ, Show MD, Ingraham JG, Flinders J, et al. (2008) Decreased recognition of SUMO-sensitive target genes following modification of SF-1 (NR5A1). *Mol Cell Biol* 28: 7476–7486.
82. Ogawa H, Komatsu T, Hiraoka Y, Morohashi K (2009) Transcriptional Suppression by Transient Recruitment of ARIP4 to Sumoylated nuclear receptor Ad4BP/SF-1. *Mol Biol Cell* 20: 4235–4245.



83. Hwang EJ, Lee JM, Jeong J, Park JH, Yang Y, et al. (2009) SUMOylation of RORalpha potentiates transcriptional activation function. *Biochem Biophys Res Commun* 378: 513–517.
84. Sentis S, Le Romancer M, Bianchin C, Rostan MC, Corbo L (2005) Sumoylation of the estrogen receptor alpha hinge region regulates its transcriptional activity. *Mol Endocrinol* 19: 2671–2684.
85. Rodenburg KW, Van der Horst DJ (2005) Lipoprotein-mediated lipid transport in insects: analogy to the mammalian lipid carrier system and novel concepts for the functioning of LDL receptor family members. *Biochim Biophys Acta* 1736: 10–29.
86. Dai JD, Henrich VC, Gilbert LI (1991) An ultrastructural analysis of the ecdysoneless (*l(3)ecd1ts*) ring gland during the third larval instar of *Drosophila melanogaster*. *Cell Tissue Res* 265: 435–445.
87. Takeda N (1976) Activatory mechanisms of the prothoracic glands of *Monema flavescens* (Lepidoptera) with special reference to the secretion of ecdysone. *Biol Bull* 150: 500–521.
88. Birkenbeil H (1983) Ultrastructural and immunocytochemical investigation of ecdysteroid secretion by the prothoracic gland of the waxmoth *Galleria mellonella*. *Cell Tissue Res* 229: 433–441.
89. Parra-Peralbo E, Culi J (2011) *Drosophila* lipophorin receptors mediate the uptake of neutral lipids in oocytes and imaginal disc cells by an endocytosis-independent mechanism. *PLoS Genet* 7: e1001297. doi:10.1371/journal.pgen.1001297.
90. Kraemer F (2007) Adrenal cholesterol utilization. *Mol Cell Endocrinol* 265–266: 42–45.
91. Connelly M (2009) SR-BI-mediated HDL cholesteryl ester delivery in the adrenal gland. *Mol Cell Endocrinol* 300: 83–88.
92. Hu J, Zhang Z, Shen WJ, Azhar S (2010) Cellular cholesterol delivery, intracellular processing and utilization for biosynthesis of steroid hormones. *Nutr Metab (Lond)* 7: 47.
93. Reaven E, Leers-Sucheta S, Nomoto A, Azhar S (2001) Expression of scavenger receptor class B type I (SR-BI) promotes microvillar channel formation and selective cholesteryl ester transport in a heterologous reconstituted system. *Proc Natl Acad Sci U S A* 98: 1613–1618.
94. Reaven E, Nomoto A, Cortez Y, Azhar S (2006) Consequences of over-expression of rat Scavenger Receptor, SR-BI, in an adrenal cell model. *Nutr Metab (Lond)* 3: 43.
95. Connelly MA, Williams DL (2003) SR-BI and cholesterol uptake into steroidogenic cells. *Trends Endocrinol Metab* 14: 467–472.
96. Azhar S, Reaven E (2002) Scavenger receptor class BI and selective cholesteryl ester uptake: partners in the regulation of steroidogenesis. *Mol Cell Endocrinol* 195: 1–26.
97. Reaven E, Nomoto A, Leers-Sucheta S, Temel R, Williams DL, et al. (1998) Expression and microvillar localization of scavenger receptor, class B, type I (a high density lipoprotein receptor) in luteinized and hormone-desensitized rat ovarian models. *Endocrinology* 139: 2847–2856.
98. Lopez D, McLean MP (1999) Sterol regulatory element-binding protein-1a binds to cis elements in the promoter of the rat high density lipoprotein receptor SR-BI gene. *Endocrinology* 140: 5669–5681.
99. Stangl H, Graf GA, Yu L, Cao G, Wyne K (2002) Effect of estrogen on scavenger receptor BI expression in the rat. *J Endocrinol* 175: 663–672.
100. Sun Y, Wang N, Tall AR (1999) Regulation of adrenal scavenger receptor-BI expression by ACTH and cellular cholesterol pools. *J Lipid Res* 40: 1799–1805.
101. Rogers ME, Krieger J, Vogt RG (2001) Antennal SNMPs (sensory neuron membrane proteins) of Lepidoptera define a unique family of invertebrate CD36-like proteins. *J Neurobiol* 49: 47–61.
102. Wang C, Liu Z, Huang X (2012) Rab32 is important for autophagy and lipid storage in *Drosophila*. *PLoS ONE* 7: e32086. doi:10.1371/journal.pone.0032086.
103. Guo Y, Walther TC, Rao M, Stuurman N, Goshima G, et al. (2008) Functional genomic screen reveals genes involved in lipid-droplet formation and utilization. *Nature* 453: 657–661.
104. Fluegel ML, Parker TJ, Pallanck LJ (2006) Mutations of a *Drosophila* NPC1 gene confer sterol and ecdysone metabolic defects. *Genetics* 172: 185–196.
105. Huang X, Suyama K, Buchanan J, Zhu AJ, Scott MP (2005) A *Drosophila* model of the Niemann-Pick type C lysosome storage disease: *dnpc1a* is required for molting and sterol homeostasis. *Development* 132: 5115–5124.
106. Huang X, Warren JT, Buchanan J, Gilbert LI, Scott MP (2007) *Drosophila* Niemann-Pick type C-2 genes control sterol homeostasis and steroid biosynthesis: a model of human neurodegenerative disease. *Development* 134: 3733–3742.
107. Colombani J, Bianchini L, Layalle S, Pondeville E, Dauphin-Villemant C, et al. (2005) Antagonistic actions of ecdysone and insulins determine final size in *Drosophila*. *Science* 310: 667–670.
108. Mirth C, Truman JW, Riddiford L (2005) The role of the prothoracic gland in determining critical weight for metamorphosis in *Drosophila melanogaster*. *Curr Biol* 15: 1796–1807.
109. Bischof J, Maeda RK, Hediger M, Karch F, Basler K (2007) An optimized transgenesis system for *Drosophila* using germ-line-specific phiC31 integrases. *Proc Natl Acad Sci U S A* 104: 3312–3317.
110. Sánchez J, Talamillo A, Lopitz-Otsoa F, Pérez C, Hjerpe R, et al. (2010) Sumoylation modulates the activity of Spalt-like proteins during wing development in *Drosophila*. *J Biol Chem* 285: 25841–25849.
111. González M, Martín-Ruiz I, Jiménez S, Pirone L, Barrio R, et al. (2011) Generation of stable *Drosophila* cell lines using multicistronic vectors. *Sci Rep* 1: 75.
112. Spradling AC, Rubin GM (1982) Transposition of cloned P elements into *Drosophila* germ line chromosomes. *Science* 218: 341–347.
113. Franco M, Seyfried NT, Brand AH, Peng J, Mayor U (2011) A novel strategy to isolate ubiquitin conjugates reveals wide role for ubiquitination during neural development. *Mol Cell Proteomics* 10: M110.002188.
114. Yanagawa S, Lee JS, Ishimoto A (1998) Identification and characterization of a novel line of *Drosophila* Schneider S2 cells that respond to wingless signaling. *J Biol Chem* 273: 32353–32359.
115. Potter CJ, Tasic B, Russler EV, Liang L, Luo L (2010) The Q system: a repressible binary system for transgene expression, lineage tracing, and mosaic analysis. *Cell* 141: 536–548.
116. Potter CJ, Tasic B, Russler EV, Liang L, Luo L (2010) The Q system: a repressible binary system for transgene expression, lineage tracing, and mosaic analysis. *Cell* 141: 536–548.
117. Smith M, Bhaskar V, Fernandez J, Courey AJ (2004) *Drosophila* Ulp1, a nuclear pore-associated SUMO protease, prevents accumulation of cytoplasmic SUMO conjugates. *J Biol Chem* 279: 43805–43814.
118. Franc NC, Dimarcq JL, Lagueux M, Hoffmann J, Ezekowitz RA (1996) Croquemort, a novel *Drosophila* hemocyte/macrophage receptor that recognizes apoptotic cells. *Immunity* 4: 431–443.
119. Benton R, Vannice KS, Voshall LB (2007) An essential role for a CD36-related receptor in pheromone detection in *Drosophila*. *Nature* 450: 289–293.
